# Supplementary material for: Efficacy and safety of anakinra and canakinumab in PSTPIP1-associated inflammatory diseases: a comprehensive scoping review
Source: PubMed Central journal article supplement (PMC10801072; doi:10.3389/fimmu.2023.1339337), 2024-01-08
Supplement: DataSheet_1.pdf [file DataSheet_1.pdf]

## Supplementary material

### Efficacy and Safety of Anakinra and Canakinumab in PSTPIP1-associated inflammatory diseases: A Comprehensive Scoping Review

Sanz-Cabanillas JL, M.D.1,2,#, Gómez-García F, M.D., Ph.D.1,2,#; Gómez Arias PJ, M.D.1,2; Montilla-López A, M.D.1; Gay-Mimbrera J, B. Sc.1; Ruano J, M.D., M.Sc., Ph.D.1,2,; Isla-Tejera B, Pharm.D., Ph.D.3,\*; Parra-Peralbo E, M.Sc., PhD 4

<sup>1</sup>Inflammatory Immune-mediated Chronic Skin Diseases' Laboratory, IMIBIC/Reina Sofia University Hospital/University of Cordoba, Menendez Pidal Ave, 14004, Córdoba, Spain.

<sup>2</sup>Department of Dermatology, Reina Sofia University Hospital, Menendez Pidal Ave, 14004, Córdoba, Spain.

<sup>3</sup>Department of Pharmacology, Reina Sofia University Hospital, Menendez Pidal Ave, 14004, Córdoba, Spain.

<sup>4</sup> Department of Pharmacy and Nutrition, Faculty of Biomedical Science and Health, Universidad Europea, Calle Tajo, s/n, 28670, Villaviciosa de Odón, Madrid

#Equal contributors.

## **SUPPLEMENTARY TABLES**

**Table S1.** Search strategies in literature databases.

**Table S2.** List of included studies.

**Table S3.** List of excluded studies with reasons for exclusion.

**Table S4.** Mapping studies on PAPA.

**Table S5.** Mapping studies on PAMI.

**Table S6.** Mapping studies on PASH.

**Table S7.** Mapping studies on PASS, PAPASH, and PAC.

**Table S8.** Genetic and clinical characteristics of patients with PAPA included in the review.

**Table S9.** Genetic and clinical characteristics of patients with PAMI included in the review.

**Table S10.** Genetic and clinical characteristics of patients with PASH included in the review.

**Table S11.** Genetic and clinical characteristics of patients with PASS, PAPASH, and PAC included in the review.

**Table S1.** Search strategies in literature databases.

**Databases:** MEDLINE and EMBASE

**Search strategy:**

"Treatment AND ('interleukin 1beta' OR 'interleukin 1') AND 'skin disease' OR (('canakinumab' OR 'anakinra' OR 'rilonacept' OR mabp1) AND ('candle syndrome'/exp OR 'candle syndrome' OR (neutrophilic AND urticarial AND dermatosis) OR (undifferentiated AND autoinflammatory AND syndromes) OR (autoinflammatory AND skin AND bone AND disease) OR ('cryopyrin associated' AND periodic AND syndromes) OR (aseptic AND abscess AND syndrome) OR (acute AND febrile AND neutrophilic AND dermatosis) OR ('pyrin associated' AND autoinflammation AND with AND neutrophilic AND dermatosis) OR (deficiency AND of AND 'interleukin 1' AND receptor AND antagonist) OR (nonbacterial AND osteomyelitis AND associated AND diseases) OR (papa AND syndrome) OR (neutrophilic AND dermatoses AND in AND 'adult onset' AND autoinflammatory AND syndromes) OR (majeed AND syndrome) OR (sapho AND syndrome) OR (chronic AND recurrent AND multifocal AND osteomyelitis) OR (amicrobial AND pustulosis AND of AND the AND skin AND fold) OR (refractory AND aseptic AND abscesses AND syndrome) OR 'blau syndrome' OR (chronic AND atypical AND neutrophilic AND dermatitis AND with AND lipodystrophy AND elevated AND temperature AND syndrome) OR ('neonatal onset' AND multisystem AND inflammatory AND disease) OR (chronic AND infantile AND neurologic, AND cutaneous, AND arthritis) OR 'pash syndrome' OR 'macrophage activation syndrome' OR (neutrophilic AND panniculitis) OR 'pfapa syndrome' OR (autoinflammatory AND disease AND associated AND with AND mutations) OR (hidradenitis AND suppurativa) OR 'suppurative hidradenitis' OR 'psoriasis' OR 'atopic dermatitis' OR (pyoderma AND gangrenous) OR 'pyoderma gangrenosum' OR 'skin allergy'" OR 'acne' OR (pustular AND psoriasis) OR (dissecting AND cellulitis AND of AND the AND scalp) OR (childhood AND

pustular AND dermatosis) OR (refractory AND 'anti mda5' AND clinically AND amyopathic AND dermatomyopathy) OR (autoimmune AND bullous AND dermatoses) OR (acrodermatitis AND continua AND of AND hallopeau) OR 'melanoma' OR 'schnitzler syndrome' OR ('erdheim chester' AND disease) OR (neck AND squamous AND cell AND carcinoma) OR (squamous AND cell AND carcinoma) OR 'langerhans cell histiocytosis' OR 'skin cancer' OR 'multicentric reticulohistiocytosis' OR 'poems syndrome' OR 'erythema nodosum' OR prurito OR (pigmentary AND hypertrichosis AND nonautoimmune AND 'insulin dependent' AND diabetes AND mellitus AND phid AND syndrome) OR (systemic AND sclerosis AND morphoea) OR (autosomal AND recessive AND congenital AND ichthyoses) OR 'recessive dystrophic epidermolysis bullosa' OR (chronic AND ulcers) OR 'pemphigus vulgaris' OR 'erythema elevatum diutinum' OR 'xanthelasma palpebrarum' OR 'netherton disease' OR (acute AND radiation AND dermatitis) OR (aicardi AND goutieres AND syndrome) OR 'granulomatous skin disease' OR 'scleroderma' OR 'lichen sclerosus et atrophicus' OR 'pemphigus foliaceus' OR 'ocular rosacea' OR 'amyloidosis' OR 'lupus erythematosus' OR 'sjoegren syndrome' OR (still AND disease) OR 'familial mediterranean fever' OR (cryopirin AND associated AND inflammatory AND syndrome) OR 'muckle wells' OR 'tumor necrosis factor receptor associated periodic syndrome')) AND ('case report'/de OR 'clinical article'/de OR 'clinical trial'/de OR 'clinical trial (topic)'/de OR 'cohort analysis'/de OR 'controlled clinical trial'/de OR 'controlled study'/de OR 'drug dose comparison'/de OR 'human'/de OR 'human cell'/de OR 'human tissue'/de OR 'major clinical study'/de OR 'multicenter study'/de OR 'observational study'/de OR 'phase 2 clinical trial (topic)'/de OR 'phase 3 clinical trial (topic)'/de OR 'practice guideline'/de OR 'randomized controlled trial'/de OR 'randomized controlled trial (topic)'/de OR 'retrospective study'/de OR 'systematic review'/de)'papash syndrome' AND [01-01-1989]/sd NOT [03-02-2022]/sd) OR (('papash syndrome' AND [01-01-1989]/sd NOT [03-02-2022]/sd) OR (('papash syndrome' AND [01-01-1989]/sd NOT [03-02-2022]/sd)

OR (('pash syndrome' AND [01-01-1989]/sd NOT [03-02-2022]/sd) OR (('pass syndrome' AND [01-01-1989]/sd NOT [03-02-2022]/sd) OR (('pac syndrome' AND [01-01-1989]/sd NOT [03-02-2022]/sd)

**Table S2.** List of included studies.

| Article ID | Article                                                                                                                                                                                                                                                                                             |
|------------|-----------------------------------------------------------------------------------------------------------------------------------------------------------------------------------------------------------------------------------------------------------------------------------------------------|
| 1          | Anakinra for flares of pyogenic arthritis in PAPA syndrome. Dierselhuis MP, Frenkel J, Wulffraat NM, Boelens JJ. <i>Rheumatology (Oxford)</i> . 2005 Mar;44(3):406-8.                                                                                                                               |
| 2          | Dramatic improvement of pyoderma gangrenosum with infliximab in a patient with PAPA syndrome. Stichweh DS, Punaro M, Pascual V. <i>Pediatr Dermatol</i> . 2005 May-Jun;22(3):262-5.                                                                                                                 |
| 3          | Targeted treatment of pyoderma gangrenosum in PAPA (pyogenic arthritis, pyoderma gangrenosum and acne) syndrome with the recombinant human interleukin-1 receptor antagonist anakinra. Brenner M, Ruzicka T, Plewig G, Thomas P, Herzer P. <i>Br J Dermatol</i> . 2009 Nov;161(5):1199-201.         |
| 4          | Variable expression and treatment of PAPA syndrome. Schellevis MA, Stoffels M, Hoppenreijns EP, Bodar E, Simon A, van der Mee JW. <i>Ann Rheum Dis</i> . 2011 Jun;70(6):1168-70.                                                                                                                    |
| 5          | Pyoderma gangrenosum, acne, and suppurative hidradenitis (PASH)--a new autoinflammatory syndrome distinct from PAPA syndrome. Braun-Falco M, Kovnerystyy O, Lohse P, Ruzicka T. <i>J Am Acad Dermatol</i> . 2012 Mar;66(3):409-15.                                                                  |
| 6          | Identification of a homozygous PSTPIP1 mutation in a patient with a PAPA-like syndrome responding to canakinumab treatment. Geusau A, Mothes-Luksch N, Nahavandi H, Pickl WF, Wise CA, Pourpak Z, Ponweiser E, Eckhart L, Sunder-Plassmann R. <i>JAMA Dermatol</i> . 2013 Feb;149(2):209-15.        |
| 7          | Pyogenic arthritis, pyoderma gangrenosum, acne, and hidradenitis suppurativa (PAPASH): a new autoinflammatory syndrome associated with a novel mutation of the PSTPIP1 gene. Marzano AV, Trevisan V, Gattorno M, Ceccherini I, De Simone C, Crosti C. <i>JAMA Dermatol</i> . 2013 Jun;149(6):762-4. |
| 8          | Osteolytic lesion in PAPA syndrome responding to anti-interleukin 1 treatment. Caorsi R, Picco P, Buoncompagni A, Martini A, Gattorno M. <i>J Rheumatol</i> . 2014 Nov;41(11):2333-4.                                                                                                               |
| 9          | Pyoderma gangrenosum, acne and ulcerative colitis in a patient with a novel mutation in the PSTPIP1 gene. Zeeli T, Padalon-Brauc G, Ellenbogen E, Gat A, Sarig O, Sprecher E. <i>Clin Exp Dermatol</i> . 2015 Jun;40(4):367-72.                                                                     |
| 10         | Two cases of severe hidradenitis suppurativa with failure of anakinra therapy. Menis D, Maroñas-Jiménez L, Delgado-Marquez AM, Postigo-Llorente C, Vanaclocha-Sebastián F. <i>Br J Dermatol</i> . 2015 Mar;172(3):810-1.                                                                            |

| Article ID | Article                                                                                                                                                                                                                                                                                                                                                            |
|------------|--------------------------------------------------------------------------------------------------------------------------------------------------------------------------------------------------------------------------------------------------------------------------------------------------------------------------------------------------------------------|
| 11         | Long-term efficacy of IL-1 blockers in PAPA patients. Finetti, M., Caorsi, R., Marotto, D. et al. <i>Pediatr Rheumatol</i> 13 (Suppl 1), P207 (2015).                                                                                                                                                                                                              |
| 12         | The phenotypic variability of PAPA syndrome: evidence from the Eurofever Registry. Caorsi, R., Marotto, D., Insalaco, A. et al. <i>Pediatr Rheumatol</i> 13 (Suppl 1), O8 (2015).                                                                                                                                                                                  |
| 13         | Interleukin-1 receptor antagonist treatment revealed active hepatitis B infection in a boy with PAPA syndrome. Selmanovic, V., DeBenedeti, F., Omercahić-Dizdarevic, A. et al.. <i>Pediatr Rheumatol</i> 13 (Suppl 1), P11 (2015).                                                                                                                                 |
| 14         | Successful treatment of PASH syndrome with infliximab, cyclosporine and dapsone. Staub J, Pfannschmidt N, Strohal R, Braun-Falco M, Lohse P, Goerdts S, Leverkus M. <i>J Eur Acad Dermatol Venereol</i> . 2015 Nov;29(11):2243-7.                                                                                                                                  |
| 15         | PASS Syndrome: An IL-1-Driven Autoinflammatory Disease. Leuenberger M, Berner J, Di Lucca J, Fischer L, Kaparos N, Conrad C, Hohl D, So A, Gilliet M. <i>Dermatology</i> . 2016;232(2):254-8.                                                                                                                                                                      |
| 16         | IL-1 Blocker Therapy for Articular Flares in PAPA Syndrome. Mehul Jariwala; Jennifer Stimec; Karen Watanabe Duffy; Claudia Martinez-Rios; Lynn Spiegel; Ronald Laxer. <i>The Journal of Rheumatology</i> 2016; 43:6                                                                                                                                                |
| 17         | Disease activity accounts for long-term efficacy of IL-1 blockers in pyogenic sterile arthritis pyoderma gangrenosum and severe acne syndrome. Omenetti A, Carta S, Caorsi R, Finetti M, Marotto D, Lattanzi B, Jorini M, Delfino L, Penco F, Picco P, Buoncompagni A, Martini A, Rubartelli A, Gattorno M. <i>Rheumatology (Oxford)</i> . 2016 Jul;55(7):1325-35. |
| 18         | Treatment of pyoderma gangrenosum, acne, suppurative hidradenitis (PASH) with weight-based anakinra dosing in a Hepatitis B carrier. Jennings L, Molloy O, Quinlan C, Kelly G, O'Kane M. <i>Int J Dermatol</i> . 2017 Jun;56(6):e128-e129.                                                                                                                         |
| 19         | Pyogenic arthritis, pyoderma gangrenosum, and acne (PAPA) syndrome: differential diagnosis of septic arthritis by regular detection of exceedingly high synovial cell counts. Löffler W, Lohse P, Weihmayr T, Widenmayer W. <i>Infection</i> . 2017 Aug;45(4):395-402.                                                                                             |
| 20         | Non-response to Interleukin-1 Antagonist Canakinumab in Two Patients with Refractory Pyoderma Gangrenosum and Hidradenitis Suppurativa. Sun NZ, Ro T, Jolly P, Sayed CJ. <i>J Clin Aesthet Dermatol</i> . 2017 Sep;10(9):36-38.                                                                                                                                    |
| 21         | The expanding spectrum of clinical phenotypes associated with PSTPIP1 mutations: from PAPA to PAMI syndrome and beyond. Klötgen HW, Beltraminelli H, Yawalkar N, van Gijn ME, Holzinger D, Borradori L. <i>Br J Dermatol</i> . 2018 Apr;178(4):982-983.                                                                                                            |

| Article ID | Article                                                                                                                                                                                                                                                                                                                                                                       |
|------------|-------------------------------------------------------------------------------------------------------------------------------------------------------------------------------------------------------------------------------------------------------------------------------------------------------------------------------------------------------------------------------|
| 22         | Imaging findings of sterile pyogenic arthritis, pyoderma gangrenosum and acne (PAPA) syndrome: differential diagnosis and review of the literature. Martinez-Rios C, Jariwala MP, Highmore K, Duffy KW, Spiegel L, Laxer RM, Stimec J. <i>Pediatr Radiol</i> . 2019 Jan;49(1):23-36.                                                                                          |
| 23         | Burlakov V, Kozlova A, Mersiyanova I, et al THU0638 Clinical characteristic of a group of patients with pstpip1-associated myeloid-related proteinemia inflammatory syndrome (PAMI) <i>Annals of the Rheumatic Diseases</i> 2018;77:514.                                                                                                                                      |
| 24         | PAPASH, PsAPASH and PASS autoinflammatory syndromes: phenotypic heterogeneity, common biological signature and response to immunosuppressive regimens. Gottlieb J, Madrange M, Gardair C, Sbidian E, Frazier A, Wolkenstein P, Hickman G, Schneider P, Baudry C, Claudepierre P, Bertheau P, Richette P, Smahi A, Bachelez H. <i>Br J Dermatol</i> . 2019 Oct;181(4):866-869. |
| 25         | Clinical picture of 7 PAPA patients followed in a single pediatric rheumatologic center. Federici, Silvia & Celani, Camilla & Messina, Virginia & Marucci, Giulia & Kessel, Christoph & De Benedetti, Fabrizio & Insalaco, Antonella. (2019). <i>Annals of the Rheumatic Diseases</i> . 78. 1337.2-1338. 10.1136/annrheumdis-2019-eular.6176.                                 |
| 26         | PAPA syndrome: novelties from the Eurofever registry. Roberta Caorsi, D.M. <i>Pediatric Rheumatology online Journal</i> , 17(S1), (2019).                                                                                                                                                                                                                                     |
| 27         | Tildrakizumab in the treatment of PASH syndrome: A potential novel therapeutic target. Kok Y, Nicolopoulos J, Varigos G, Howard A, Dolianitis C. <i>Australas J Dermatol</i> . 2020 Aug;61(3):e373-e374.                                                                                                                                                                      |
| 28         | PASS: a rare syndrome within the autoinflammatory diseases that still lacks a genetic marker. Schwob E, Bessis D, Boursier G, Kottler D, Guillot B, Lerisson M, Girard C. <i>J Eur Acad Dermatol Venereol</i> . 2020 Sep;34(9):e478-e480.                                                                                                                                     |
| 29         | Brief report: genotype, phenotype, and clinical course in five patients with PAPA syndrome (pyogenic sterile arthritis, pyoderma gangrenosum, and acne). Demidowich AP, Freeman AF, Kuhns DB, Aksentijevich I, Gallin JI, Turner ML, Kastner DL, Holland SM. <i>Arthritis Rheum</i> . 2012 Jun;64(6):2022-7.                                                                  |
| 30         | Association of pyoderma gangrenosum, acne, and suppurative hidradenitis (PASH) shares genetic and cytokine profiles with other autoinflammatory diseases. Marzano AV, Ceccherini I, Gattorno M, Fanoni D, Caroli F, Rusmini M, Grossi A, De Simone C, Borghi OM, Meroni PL, Crosti C, Cugno M. <i>Medicine (Baltimore)</i> . 2014 Dec;93(27):e187.                            |
| 31         | HSCT is effective in patients with PSTPIP1-associated myeloid-related proteinemia inflammatory (PAMI) syndrome. Laberko A, Burlakov V, Maier S, Abinun M, Skinner R, Kozlova A, Suri D, Lehmborg K, Müller I, Balashov D, Novichkova G, Holzinger D, Gennery AR, Shcherbina A. <i>J Allergy Clin Immunol</i> . 2021 Jul;148(1):250-255.e1.                                    |
| 32         | Haematological involvement associated with a mild autoinflammatory phenotype, in two patients carrying the E250K mutation of PSTPIP1. Belelli E, Passarelli C, Pardeo M, Holzinger D, De Benedetti F, Insalaco A. <i>Clin Exp Rheumatol</i> . 2017 Nov-Dec;35 Suppl 108(6):113-115.                                                                                           |



| Article ID | Article                                                                                                                                                                                                                                                                           |
|------------|-----------------------------------------------------------------------------------------------------------------------------------------------------------------------------------------------------------------------------------------------------------------------------------|
| 33         | Immunological repertoire linked to PSTPIP1-associated myeloid-related inflammatory (PAMI) syndrome. Mendonça LO, Terreri MT, Osaku FM, Barros SF, Köhler KF, Prado AI, Barros MT, Kalil J, Castro FFM. <i>Pediatr Rheumatol Online J</i> . 2021 Aug 16;19(1):126.                 |
| 34         | Kidney Involvement in PSTPIP1 Associated Inflammatory Diseases (PAID): A Case Report and Review of the Literature. Borgia P, Papa R, D'Alessandro M, Caorsi R, Piaggio G, Angeletti A, Ceccherini I, Ghiggeri GM, Gattorno M. <i>Front Med (Lausanne)</i> . 2021 Oct 29;8:759092. |
| 35         | Hemolysis and Neurologic Impairment in PAMI Syndrome: novel Characteristics of an Elusive Disease. Del Borrello G, Guardo D, Micalizzi C, Ceccherini I, Miano M, Gattorno M, Dufour C. <i>Pediatrics</i> . 2021 Mar;147(3):e20200784.                                             |
| 36         | Successful combined antibiotic therapy with oral clindamycin and oral rifampicin for pyoderma gangrenosum in patient with PASH syndrome. Lamiaux M, Dabouz F, Wantz M, Lebas D, Lasek A, Courivaud D, Modiano P. <i>JAAD Case Rep</i> . 2017 Dec 18;4(1):17-21.                   |

**Table S3.** List of excluded studies with reasons for exclusion.

| <b>ID</b> | <b>Article</b>                                                                                                                                                                                                                                                                                                                                                                                                                                                                                                                                                                                                                                                                                                                                                                                                                  | <b>Reason for exclusion</b> |
|-----------|---------------------------------------------------------------------------------------------------------------------------------------------------------------------------------------------------------------------------------------------------------------------------------------------------------------------------------------------------------------------------------------------------------------------------------------------------------------------------------------------------------------------------------------------------------------------------------------------------------------------------------------------------------------------------------------------------------------------------------------------------------------------------------------------------------------------------------|-----------------------------|
| 1.        | Anakinra therapy in a patient with multifocal pyoderma gangrenosum and hidradenitis suppurativa.<br>Oymanns M, Kreuter A, Assaf C. <i>Hautarzt</i> . 2021 May;72(5):435-438.                                                                                                                                                                                                                                                                                                                                                                                                                                                                                                                                                                                                                                                    | No English                  |
| 2.        | Rare cases of PAMI syndrome in both father and son with the same missense mutation in PSTPIP1 gene and literature review. Huang X, Xu M, Dai S, Wang M, Zheng H, Zeng K, Li L. <i>J Dermatol</i> . 2021 Apr;48(4):519-528.                                                                                                                                                                                                                                                                                                                                                                                                                                                                                                                                                                                                      | No anti-IL-1 treatment.     |
| 3.        | Pyoderma gangrenosum and concomitant hidradenitis suppurativa--rapid response to canakinumab (anti-IL-1 $\beta$ ). Jaeger T, Andres C, Grosber M, Zirbs M, Hein R, Ring J, Traidl-Hoffmann C. <i>Eur J Dermatol</i> . 2013 May-Jun;23(3):408-10.                                                                                                                                                                                                                                                                                                                                                                                                                                                                                                                                                                                | No PAID syndrome            |
| 4.        | Autoinflammatory syndromes associated with hidradenitis suppurativa and/or acne. Vinkel C, Thomsen SF. <i>Int J Dermatol</i> . 2017 Aug;56(8):811-818.                                                                                                                                                                                                                                                                                                                                                                                                                                                                                                                                                                                                                                                                          | Review                      |
| 5.        | A Snapshot on the On-Label and Off-Label Use of the Interleukin-1 Inhibitors in Italy among Rheumatologists and Pediatric Rheumatologists: A Nationwide Multi-Center Retrospective Observational Study. Vitale A, Insalaco A, Sfriso P, Lopalco G, Emmi G, Cattalini M, Manna R, Cimaz R, Priori R, Talarico R, Gentileschi S, de Marchi G, Frassi M, Gallizzi R, Soriano A, Alessio M, Cammelli D, Maggio MC, Marcolongo R, La Torre F, Fabiani C, Colafrancesco S, Ricci F, Galozzi P, Viapiana O, Verrecchia E, Pardeo M, Cerrito L, Cavallaro E, Olivieri AN, Paolazzi G, Vitiello G, Maier A, Silvestri E, Stagnaro C, Valesini G, Mosca M, de Vita S, Tincani A, Lapadula G, Frediani B, De Benedetti F, Iannone F, Punzi L, Salvarani C, Galeazzi M, Rigante D, Cantarini L. <i>Front Pharmacol</i> . 2016 Oct 24;7:380. | No PAID syndrome. Review.   |
| 6.        | New described dermatological disorders. Gönül M, Cevirgen Cemil B, Keseroglu HO, Kaya Akis H. <i>Biomed Res Int</i> . 2014;2014:616973.                                                                                                                                                                                                                                                                                                                                                                                                                                                                                                                                                                                                                                                                                         | Review                      |
| 7.        | Phenotype variability of autoinflammatory disorders in the pediatric patient: A pictorial overview. Rigante D. <i>Journal of Evidence-Based Medicine</i> (2020) 13:3 (227-245).                                                                                                                                                                                                                                                                                                                                                                                                                                                                                                                                                                                                                                                 | Review                      |
| 8.        | Investigational drugs in clinical trials for Hidradenitis Suppurativa. Theut Riis P. Et al. <i>Expert Opinion on Investigational Drugs</i> (2018) 27:1 (43-53).                                                                                                                                                                                                                                                                                                                                                                                                                                                                                                                                                                                                                                                                 | No PAID syndrome            |
| 9.        | Endpoints of clinical trials for Hidradenitis Suppurativa: Proceedings of a round-table session. Zouboulis C.C., Gulliver W., Ingram J., Kirby B., Giamarellos-Bourboulis                                                                                                                                                                                                                                                                                                                                                                                                                                                                                                                                                                                                                                                       | No PAID syndrome            |

|     |                                                                                                                                                                                                                                   |                  |
|-----|-----------------------------------------------------------------------------------------------------------------------------------------------------------------------------------------------------------------------------------|------------------|
|     | E.J., Podda M., Tzellos T., Jemec G.B.E. <i>Experimental Dermatology</i> (2020) 29:S1 (67-72).                                                                                                                                    |                  |
| 10. | Clinical Disease Patterns in a Regional Swiss Cohort of 34 Pyoderma Gangrenosum Patients. Kolios A.G.A. Et al. <i>Dermatology</i> (2018) 233:4 (268-276).                                                                         | No PAID syndrome |
| 11. | Targeted treatments for hidradenitis suppurativa: a review of the current literature and ongoing clinical trials. Maarouf M. Et al. <i>Journal of Dermatological Treatment</i> (2017) (1-9).                                      | No PAID syndrome |
| 12. | Canakinumab for severe hidradenitis suppurativa: Preliminary experience in 2 cases. Houriet C. Et al. <i>JAMA Dermatology</i> (2017) 153:11 (1195-1197).                                                                          | No PAID syndrome |
| 13. | Drug management of neutrophilic dermatoses. Garcovich S. Et al. <i>Expert Review of Clinical Pharmacology</i> (2017) 10:10 (1119-1128).                                                                                           | No PAID syndrome |
| 14. | Pyoderma Gangrenosum: A Current Problem as Much as an Unknown One. Vallini V. Et al. <i>International Journal of Lower Extremity Wounds</i> (2017) 16:3 (191-201).                                                                | No PAID syndrome |
| 15. | SAPHO and Recurrent Multifocal Osteomyelitis. Greenwood S. Et al. <i>Radiologic Clinics of North America</i> (2017) 55:5 (1035-1053).                                                                                             | No PAID syndrome |
| 16. | Hidradenitis suppurativa unresponsive to canakinumab treatment: A case report. Tekin B. Et al. <i>Indian Journal of Dermatology, Venereology and Leprology</i> (2017) 83:5 (615-617).                                             | No PAID syndrome |
| 17. | Evolving frontiers in the treatment of periodic fever, aphthous stomatitis, pharyngitis, cervical adenitis (PFAPA) syndrome. Rigante D. Et al. <i>Israel Medical Association Journal</i> (2017) 19:7 (444-447).                   | No PAID syndrome |
| 18. | PAPA, PASH and PAPASH Syndromes: Pathophysiology, Presentation and Treatment. Cugno M. Et al. <i>American Journal of Clinical Dermatology</i> (2017) 18:4 (555-562).                                                              | Review           |
| 19. | Canakinumab efficacy in refractory adult-onset PFAPA syndrome. Lopalco G. Et al. <i>International Journal of Rheumatic Diseases</i> (2017) 20:8 (1050-1051).                                                                      | No PAID syndrome |
| 20. | Use of biological treatments in patients with hidradenitis suppurativa. Martin-Ezquerro G. Et al. <i>Giornale Italiano di Dermatologia e Venereologia</i> (2017) 152:4 (373-378).                                                 | No PAID syndrome |
| 21. | Medical management of hidradenitis suppurativa. Orenstein L.A.V. Et al. <i>Seminars in Cutaneous Medicine and Surgery</i> (2017) 36:2 (62-66).                                                                                    | No PAID syndrome |
| 22. | Physicians perspectives on the diagnosis and management of periodic fever, aphthous stomatitis, pharyngitis, and cervical adenitis (PFAPA) syndrome. Manthiram K. Et al. <i>Rheumatology International</i> (2017) 37:6 (883-889). | No PAID syndrome |

|     |                                                                                                                                                                                                                                                                              |                        |
|-----|------------------------------------------------------------------------------------------------------------------------------------------------------------------------------------------------------------------------------------------------------------------------------|------------------------|
| 23. | Potential of IL-1, IL-18 and inflammasome inhibition for the treatment of inflammatory skin diseases. Fenini G. Et al. <i>Frontiers in Pharmacology</i> (2017) 8:MAY Article Number: 278.                                                                                    | Review                 |
| 24. | Biologics in patients with skin diseases. Veilleux M.S. Et al. <i>Journal of Allergy and Clinical Immunology</i> (2017) 139:5 (1423-1430).                                                                                                                                   | Review                 |
| 25. | Biologic Therapy in the Treatment of Chronic Skin Disorders. Fernandez J.M. Et al. <i>Immunology and Allergy Clinics of North America</i> (2017) 37:2 (315-327).                                                                                                             | Review                 |
| 26. | Pediatric pyoderma gangrenosum: a systematic review and update. Kechichian E. Et al. <i>International Journal of Dermatology</i> (2017) 56:5 (486-495).                                                                                                                      | Review                 |
| 27. | Interventions for hidradenitis suppurativa updated summary of an original cochrane review. Ingram J.R. <i>JAMA Dermatology</i> (2017) 153:5 (458-459).                                                                                                                       | Review                 |
| 28. | Hidradenitis suppurativa: From pathogenesis to diagnosis and treatment. Napolitano M. Et al. <i>Clinical, Cosmetic and Investigational Dermatology</i> (2017) 10 (105-115).                                                                                                  | No PAID syndrome       |
| 29. | Successful Treatment of Autoimmune Disease-Associated Pyoderma Gangrenosum with the IL-1 Receptor Antagonist Anakinra: A Case Series of 3 Patients. Beynon C. Et al. <i>Journal of Clinical Rheumatology</i> (2017) 23:3 (181-183).                                          | No PAID syndrome       |
| 30. | Current systemic treatment strategies for hidradenitis suppurativa. Ponikowska M. Et al. <i>Expert Opinion on Orphan Drugs</i> (2017) 5:3 (241-251).                                                                                                                         | Review                 |
| 31. | Association of hidradenitis suppurativa and familial Mediterranean fever: A case series of 6 patients. Abbara S. Et al. <i>Joint Bone Spine</i> (2017) 84:2 (159-162).                                                                                                       | No PAID syndrome       |
| 32. | Familial mediterranean fever treated with anakinra: A case report. Espaldora-Hernández J. Et al. <i>Reumatologia Clinica</i> (2017) 13:2 (120-121).                                                                                                                          | No PAID syndrome       |
| 33. | Treatments for hidradenitis suppurativa. Andersen R.K. Et al. <i>Clinics in Dermatology</i> (2017) 35:2 (218-224).                                                                                                                                                           | Review                 |
| 34. | High level of serum human interleukin-18 in a patient with pyogenic arthritis, pyoderma gangrenosum and acne syndrome. Kanameishi S. Et al. <i>Journal of the European Academy of Dermatology and Venereology</i> (2017) 31:2 (e115-e116).                                   | No anti-IL-1 treatment |
| 35. | Severe hidradenitis suppurativa responding to treatment with secukinumab. Thorlacius L. Et al. <i>Experimental Dermatology</i> (2017) 26 Supplement 1 (3).                                                                                                                   | No PAID syndrome       |
| 36. | Pharmacokinetics and pharmacodynamics of canakinumab in patients with periodic fever syndromes (colchicine-resistant FMF, HIDS/MKD and TRAPS): Results from a phase III pivotal umbrella trial. De Benedetti F. Et al. <i>Pediatric Rheumatology</i> (2017) 15 Supplement 1. | No PAID syndrome       |
| 37. | Efficacy and safety of Canakinumab in patients with periodic fever syndromes (col-                                                                                                                                                                                           | No PAID syndrome       |

|     |                                                                                                                                                                                                                                                                                             |                  |
|-----|---------------------------------------------------------------------------------------------------------------------------------------------------------------------------------------------------------------------------------------------------------------------------------------------|------------------|
|     | chicine-resistant fmf, hids/mkd and traps): Results from a phase 3, pivotal, umbrella trial. De Benedetti F. ET AL. <i>Pediatric Rheumatology</i> (2017) 15 Supplement 1.                                                                                                                   |                  |
| 38. | Effect of canakinumab on health-related quality of life in patients with periodic fever syndromes. Lachmann H. Et al. <i>Pediatric Rheumatology</i> (2017) 15 Supplement 1.                                                                                                                 | No PAID syndrome |
| 39. | Other autoinflammatory disease genes in an FMF-prevalent population: A homozygous MVK mutation and a heterozygous TNFRSF1A mutation in two different Turkish families with clinical FMF. Karacan I. Et al. <i>Clinical and Experimental Rheumatology</i> (2017) 35 Supplement108 (S75-S81). | No PAID syndrome |
| 40. | Acne fulminans. Dall'Oglio F., Puglisi D.F., Nasca M.R., Micali G. <i>Giornale italiano di dermatologia e venereologia : organo ufficiale, Societa italiana di dermatologia e sifilografia</i> (2020).                                                                                      | Review           |
| 41. | Introduction-Biologics in Dermatology: Indications and Off-Label Usage. Puig L. <i>Current Problems in Dermatology (Switzerland)</i> (2017) 53 (vii-x).                                                                                                                                     | Review           |
| 42. | Pediatric Pyoderma Gangrenosum: A Retrospective Review of Clinical Features, Etiologic Associations, and Treatment. Schoch J.J. Et al. <i>Pediatric Dermatology</i> (2017) 34:1 (39-45).                                                                                                    | Review           |
| 43. | Treatment options for pyoderma gangrenosum. Quist S.R. Et al. <i>JDDG - Journal of the German Society of Dermatology</i> (2017) 15:1 (34-40).                                                                                                                                               | Review           |
| 44. | The Role of Interleukin-1 in Inflammatory and Malignant Human Skin Diseases and the Rationale for Targeting Interleukin-1 Alpha. Bou-Dargham M.J. Et al. <i>Medicinal Research Reviews</i> (2017) 37:1 (180-216).                                                                           | Review           |
| 45. | Pyrin-associated autoinflammation with neutrophilic dermatosis (PAAND): Preliminary results of a proof-of-concept trial with anakinra. Eyck L.V. Et al. <i>Pediatric Rheumatology</i> (2017) 15 Supplement 1.                                                                               | No PAID syndrome |
| 46. | Hidradenitis suppurativa: An update on connecting the tracts. Hamzavi I.H. Et al. <i>F1000Research</i> (2017) 6 Article Number: 1272.                                                                                                                                                       | Review           |
| 47. | Review of Current Immunologic Therapies for Hidradenitis Suppurativa. Shanmugam V.K. Et al. <i>International Journal of Rheumatology</i> (2017) 2017 Article Number: 8018192.                                                                                                               | Review           |
| 48. | Unexplained intermittent fever: PFAPA. Simmons A. Et al. <i>Paediatrics and Child Health (United Kingdom)</i> (2016) 26:12 (559-560).                                                                                                                                                       | No PAID syndrome |
| 49. | Pharmacokinetic and pharmacodynamic characteristics of canakinumab in patients with periodic fever syndromes: Results from a phase iii pivotal umbrella trial. Frenkel J. ET AL. <i>Arthritis and Rheumatology</i> (2016) 68 Supplement 10 (3103-3104).                                     | No PAID syndrome |

|     |                                                                                                                                                                                                                                                           |                        |
|-----|-----------------------------------------------------------------------------------------------------------------------------------------------------------------------------------------------------------------------------------------------------------|------------------------|
| 50. | Effect of canakinumab treatment on health-related quality of life in patients with periodic fever syndromes. Simon A. ET AL. Arthritis and Rheumatology (2016) 68 Supplement 10 (3104-3106).                                                              | No PAID syndrome       |
| 51. | The role of interleukin-1 in pyoderma gangrenosum. Galimberti R.L. Et al. JAAD Case Reports (2016) 2:5 (366-368).                                                                                                                                         | No PAID syndrome       |
| 52. | Cerebral vascular findings in PAPA syndrome: Cerebral arterial vasculopathy or vasculitis and a posterior cerebral artery dissecting aneurysm. Khatibi K. Et al. Journal of NeuroInterventional Surgery (2016) 8:8 (e29).                                 | No anti-IL-1 treatment |
| 53. | New treatment strategies for hidradenitis suppurativa. Andersen R. Et al. Drugs of Today (2016) 52:8 (439-451).                                                                                                                                           | Review                 |
| 54. | Synovitis, acne, pustulosis, hyperostosis, and osteitis (SAPHO) syndrome “A challenging diagnosis not to be missed. Zimmermann P. Et al. Journal of Infection (2016) 72 Supplement (S106-S114).                                                           | No PAID syndrome       |
| 55. | Periodic fever, aphthous stomatitis, pharyngitis, and adenitis (PFAPA) syndrome. Ali N.S. Et al. Clinics in Dermatology (2016) 34:4 (482-486).                                                                                                            | No PAID syndrome       |
| 56. | PFAPA syndrome: A review on treatment and outcome. Vanoni F. Et al. Pediatric Rheumatology (2016) 14:1 Article Number: 38.                                                                                                                                | No PAID syndrome       |
| 57. | A phase III pivotal umbrella trial of canakinumab in patients with autoinflammatory periodic fever syndromes (colchicine resistant FMF, HIDS/MKD and TRAPS). De Benedetti F. ET AL. Annals of the Rheumatic Diseases (2016) 75 Supplement 2 (615-616).    | No PAID syndrome       |
| 58. | Pharmacokinetics and pharmacodynamics of canakinumab in patients with autoinflammatory periodic fever syndromes (colchicine resistant FMF, HIDS/MKD and traps). De Benedetti F. ET AL. Annals of the Rheumatic Diseases (2016) 75 Supplement 2 (397-398). | No PAID syndrome       |
| 59. | Canakinumab improves patient reported outcomes in patients with periodic fever syndromes. Lachmann H. Et al. Annals of the Rheumatic Diseases (2016) 75 Supplement 2 (616).                                                                               | No PAID syndrome       |
| 60. | SAPHO Syndrome: Current Developments and Approaches to Clinical Treatment. Firinu D. Et al. Current Rheumatology Reports (2016) 18:6 Article Number: 35.                                                                                                  | No PAID syndrome       |
| 61. | Failure of anakinra in a CASE of severe Hidradenitis suppurativa. Russo V. Et al. Journal of Drugs in Dermatology (2016) 15:6 (772-774).                                                                                                                  | No PAID syndrome       |
| 62. | Periodic Fever, Aphthous Stomatitis, Pharyngitis, and Cervical Adenitis (PFAPA) Syndrome: a Review of the Pathogenesis. Theodoropoulou K. Et al. Current Rheuma-                                                                                          | No PAID syndrome       |

|     |                                                                                                                                                                                                                                  |                  |
|-----|----------------------------------------------------------------------------------------------------------------------------------------------------------------------------------------------------------------------------------|------------------|
|     | tology Reports (2016) 18:4 Article Number: 18.                                                                                                                                                                                   |                  |
| 63. | Neutrophilic panniculitis associated with alpha-1-antitrypsin deficiency: An update. Blanco I. Et al. British Journal of Dermatology (2016) 174:4 (753-762).                                                                     | Review           |
| 64. | Approach to and Management of the Neutrophilic Dermatoses. Kurtzman D. Et al. Current Dermatology Reports (2016) 5:1 (18-29).                                                                                                    | Review           |
| 65. | An Update on Medical Treatment Options for Hidradenitis Suppurativa. Deckers I.E. Et al. Drugs (2016) 76:2 (215-229).                                                                                                            | Review           |
| 66. | Pyoderma gangraenosum -from the right diagnostic investigations to targeted therapy. Jockenhilfer F. Et al. Phlebologie (2016) 45:5 (333-340).                                                                                   | Review           |
| 67. | Demographic, clinical and therapeutic findings in a monocentric cohort of adult patients with suspected PFAPA syndrome. Vitale A. Et al. Clinical and Experimental Rheumatology (2016) 34 Supplement102 (77-81).                 | No PAID syndrome |
| 68. | Safety and efficacy of anakinra in severe hidradenitis suppurativa a randomized clinical trial. Tzanetakou V. Et al. JAMA Dermatology (2016) 152:1 (52-59).                                                                      | No PAID syndrome |
| 69. | Randomized Controlled Trials for the Treatment of Hidradenitis Suppurativa. Van Rappard D.C. Et al. Dermatologic Clinics (2016) 34:1 (69-80).                                                                                    | No PAID syndrome |
| 70. | Guidelines for the management and treatment of periodic fever syndromes: Periodic fever, aphthous stomatitis, pharyngitis and adenitis syndrome. Terreri M.T.R.A. Et al. Revista Brasileira de Reumatologia (2016) 56:1 (52-57). | No PAID syndrome |
| 71. | Refractory peristomal pyoderma gangrenosum successfully treated with intravenous immunoglobulin: A case report. McAllister B.P. Et al. American Journal of Gastroenterology (2015) 110:12 (1739-1740).                           | No PAID syndrome |
| 72. | Towards a targeted therapy for pyoderma gangrenosum. Costanzo A et al. British Journal of Dermatology (2015) 173:5 (1124).                                                                                                       | No PAID syndrome |
| 73. | Treatment of hidradenitis suppurativa with biologic medications. Lee R.A. Et al. Journal of the American Academy of Dermatology (2015) 73:5 Supplement 1 (S82-S88).                                                              | No PAID syndrome |
| 74. | Canakinumab in adults with steroid-refractory pyoderma gangrenosum. Kolios A.G.A. Et al. British Journal of Dermatology (2015) 173:5 (1216-1223).                                                                                | No PAID syndrome |
| 75. | Interventions for hidradenitis suppurativa. Ingram J.R. Et al. Cochrane Database of Systematic Reviews (2015) 2017:2 Article Number: CD010081.                                                                                   | Review           |
| 76. | Anti-IL1-monoclonal antibody in two adult patients with PFAPA Syndrome-a single centre experience. Kortus-Gltze B. Et al. Pediatric Rheumatology (2015) 13 SUPPL. 1 (211DUMMY).                                                  | No PAID syndrome |

|     |                                                                                                                                                                                                                                           |                  |
|-----|-------------------------------------------------------------------------------------------------------------------------------------------------------------------------------------------------------------------------------------------|------------------|
| 77. | Adult PFAPA-a single centre experience. Donnelly O. Et al. Pediatric Rheumatology (2015) 13 SUPPL. 1 (252DUMMY).                                                                                                                          | No PAID syndrome |
| 78. | Long-term efficacy of IL-1 blockers in PAPA patients. Finetti M. Et al. Pediatric Rheumatology (2015) 13:1 Article Number: P207.                                                                                                          | Review           |
| 79. | Hidradenitis suppurativa and familial Mediterranean fever: A report of 6 cases and literature review. Abbara S. Et al. Pediatric Rheumatology (2015) 13 SUPPL. 1 (181DUMMY).                                                              | No PAID syndrome |
| 80. | Biologics for SAPHO syndrome: A single centre experience. Murgia G. ET AL. Allergy: European Journal of Allergy and Clinical Immunology (2015) 70 SUPPL. 101 (418-419).                                                                   | No PAID syndrome |
| 81. | Successful treatment of pyoderma gangrenosum with the interleukin-1 receptor antagonist anakinra: A case series of three patients. Chin M.F. Et al. British Journal of Dermatology (2015) 173 SUPPL. 1 (67-68).                           | No PAID syndrome |
| 82. | Pyoderma gangrenosum: Challenges and solutions. Gameiro A. Et al. Clinical, Cosmetic and Investigational Dermatology (2015) 8 (285-293).                                                                                                  | Review           |
| 83. | Neutrophilic dermatosis: Disease mechanism and treatment. Maalouf D. Et al. Current Opinion in Hematology (2015) 22:1 (23-29).                                                                                                            | Review           |
| 84. | The Medical and Laser Management of Hidradenitis Suppurativa. Hughes R. Et al. American Journal of Clinical Dermatology (2015) 16:2 (111-123).                                                                                            | Review           |
| 85. | Therapy of pyoderma gangrenosum in Germany: Results of a survey among wound experts. Al Ghazal P et al. JDDG - Journal of the German Society of Dermatology (2015) 13:4 (317-325).                                                        | Review           |
| 86. | Effective strategies for the management of pyoderma gangrenosum: A comprehensive review. Patel F. Et al. Acta Dermato-Venereologica (2015) 95:5 (525-531).                                                                                | Review           |
| 87. | Anakinra improves pyoderma gangrenosum in psoriatic arthritis: A case report. Acquitter M. Et al. Annals of Internal Medicine (2015) 163:1 (70-71).                                                                                       | No PAID syndrome |
| 88. | Refractory pyoderma gangrenosum in an infant. Etzler C. Et al. Pediatric Dermatology (2015) 32:1 (156-157).                                                                                                                               | No PAID syndrome |
| 89. | Canakinumab for the treatment of different refractory autoinflammatory disorders. Grein I.H.R. Et al. Pediatric Rheumatology (2014) 12 SUPPL. 1.                                                                                          | No PAID syndrome |
| 90. | Treatment with anti IL-1 and infectious complications in paediatric patients with systemic juvenile idiopathic arthritis and autoinflammatory diseases. Fernandez-Silveira L. Et al. Annals of the Rheumatic Diseases (2014) 73 SUPPL. 2. | No PAID syndrome |
| 91. | An open-label study of anakinra for the treatment of moderate to severe hidradenitis                                                                                                                                                      | No PAID syndrome |



|     |                                                                                                                                                                                                                                                                                   |                  |
|-----|-----------------------------------------------------------------------------------------------------------------------------------------------------------------------------------------------------------------------------------------------------------------------------------|------------------|
|     | suppurativa. Leslie K.S. Et al. Journal of the American Academy of Dermatology (2014) 70:2 (243-251).                                                                                                                                                                             |                  |
| 92. | Biological treatments for SAPHO syndrome: An update. Firinu D. Et al. Inflammation and Allergy - Drug Targets (2014) 13:3 (199-205).                                                                                                                                              | No PAID syndrome |
| 93. | Pyoderma gangrenosum: Pathogenetic oriented treatment approaches. Wollina U. Et al. Wiener Medizinische Wochenschrift (2014) 164:13-14 (263-273).                                                                                                                                 | No PAID syndrome |
| 94. | Certolizumab for the treatment of refractory disseminated pyoderma gangrenosum associated with rheumatoid arthritis. Cinotti E. Et al. Clinical and Experimental Dermatology (2014) 39:6 (750-751).                                                                               | No PAID syndrome |
| 95. | The efficacy of anti- IL-1 treatment in three patients with coexisting familial Mediterranean fever and multiple sclerosis. Ozdogan H., Ugurlu S., Uygunoglu U., Tutuncu M., Gul A., Akman G., Siva A. Multiple Sclerosis and Related Disorders (2020) 45 Article Number: 102332. | No PAID syndrome |
| 96. | Intravenous anakinra for cytokine storm syndromes. Martis N., Audemard-Verger A. The Lancet Rheumatology (2020) 2:9 (e522).                                                                                                                                                       | Review           |
| 97. | Long-term management of patients with PFAPA syndrome. Yıldız E., Kuzu S., Kahveci O.K., Ulu Ş., Bucak A. European Archives of Oto-Rhino-Laryngology (2020) 277:8 (2335-2339).                                                                                                     | No PAID syndrome |
| 98. | IL-17 in inflammatory skin diseases psoriasis and hidradenitis suppurativa. Fletcher J.M., Moran B., Petrasca A., Smith C.M. Clinical and Experimental Immunology (2020) 201:2 (121-134).                                                                                         | Review           |
| 99. | Successful treatment of severe hidradenitis suppurativa with anakinra. Zarchi K. Et al. JAMA Dermatology (2013) 149:10 (1192-1194).                                                                                                                                               | No PAID syndrome |
| 100 | A case report of a patient with crohn's disease complicated by pyoderma gangrenosum treated with intravenous immunoglobulin. Yoo L. Et al. American Journal of Gastroenterology (2013) 108 SUPPL. 1 (S421).                                                                       | No PAID syndrome |
| 101 | Trends of SAPHO therapy: Should we be content? Rozin A.P. Et al. Current Rheumatology Reviews (2013) 9:1 (28-33).                                                                                                                                                                 | No PAID syndrome |
| 102 | Failure of anti-interleukin-1 therapy in severe hidradenitis suppurativa: A case report. Van Der Zee H.H et al. Dermatology (2013) 226:2 (97-100).                                                                                                                                | No PAID syndrome |
| 103 | Periodic fever syndromes in the Czech Republic: A single-centre experience. Krakovsk V. Et al. Annals of the Rheumatic Disease (2013) 71 SUPPL. 3.                                                                                                                                | No PAID syndrome |
| 104 | SAPHO Syndrome. Carneiro S. Et al. Rheumatic Disease Clinics of North America (2013) 39:2 (401-418).                                                                                                                                                                              | No PAID syndrome |

|     |                                                                                                                                                                                                                                                                                       |                  |
|-----|---------------------------------------------------------------------------------------------------------------------------------------------------------------------------------------------------------------------------------------------------------------------------------------|------------------|
| 105 | Therapeutic strategies for SAPHO syndrome. Trotta F. Et al. Expert Opinion on Orphan Drugs (2013) 1:10 (773-780).                                                                                                                                                                     | No PAID syndrome |
| 106 | The SAPHO Syndrome. Nguyen M.T. Et al. Seminars in Arthritis and Rheumatism (2012) 42:3 (254-265).                                                                                                                                                                                    | No PAID syndrome |
| 107 | Hidradenitis suppurativa: Viewpoint on clinical phenotyping, pathogenesis and novel treatments. Van der Zee H.H. Et al. Experimental Dermatology (2012) 21:10 (735-739).                                                                                                              | Review           |
| 108 | An overview of interleukin-1 receptor Antagonist, Anakinra, in the treatment of cutaneous diseases. Pazyar N. Et al. Current Clinical Pharmacology (2012) 7:4 (271-275).                                                                                                              | Review           |
| 109 | IBD-related pyoderma gangrenosum in the biologic era: A single centre, 5-year case series and systematic literature review. Agarwal A. Et al. Journal of Gastroenterology and Hepatology (2012) 27 SUPPL. 4 (96).                                                                     | Review           |
| 110 | A case of resistant adult-onset periodic fever, aphthous stomatitis, pharyngitis and cervical adenitis (PFAPA) syndrome responsive to anakinra. Cantarini L. Et al. Clinical and Experimental Rheumatology (2012) 30:4 (593).                                                         | No PAID syndrome |
| 111 | Indications and modes of use for interleukin (IL)-1 antagonists in inflammatory dermatosis: A new therapeutic approach to immune-mediated inflammatory diseases. Lipsker D. Et al. Annales de Dermatologie et de Venereologie (2012) 139:6-7 (459-467).                               | Review           |
| 112 | Anakinra treatment of SAPHO syndrome: Short-term results of an open study. Wendling D. Et al. Annals of the Rheumatic Diseases (2012) 71:6 (1098-1100).                                                                                                                               | No PAID syndrome |
| 113 | Interleukin-1, inflammasomes, autoinflammation and the skin. Contassot E. Et al. Swiss Medical Weekly (2012) 142:MAY Article Number: w13590.                                                                                                                                          | Review           |
| 114 | Failure of anakinra treatment of pyoderma gangrenosum in an IBD patient and relevance to the PSTPIP1 gene. Lin Z. ET AL. Inflammatory Bowel Diseases (2011) 17:6 (E41-E42).                                                                                                           | No PAID syndrome |
| 115 | Periodic fever, aphthous stomatitis, pharyngitis, and adenitis (PFAPA) is a disorder of innate immunity and Th1 activation responsive to IL-1 blockade. Stojanov S. Et al. Proceedings of the National Academy of Sciences of the United States of America (2011) 108:17 (7148-7153). | No PAID syndrome |
| 116 | Pyoderma gangraenosum. Wollina U. Et al. Current Opinion in Rheumatology (2011) 23:1 (50-56).                                                                                                                                                                                         | Review           |
| 117 | Targeting the IL-1 family members in skin inflammation. Jensen L.E. Current Opinion in Investigational Drugs (2010) 11:11 (1211-1220).                                                                                                                                                | Review           |

|     |                                                                                                                                                                                                                                                                                   |                        |
|-----|-----------------------------------------------------------------------------------------------------------------------------------------------------------------------------------------------------------------------------------------------------------------------------------|------------------------|
| 118 | Hidradenitis suppurativa and concomitant pyoderma gangrenosum: A case series and literature review. Hsiao J.L. Et al. Archives of Dermatology (2010) 146:11 (1265-1270).                                                                                                          | No anti-IL-1 treatment |
| 119 | Biologics in dermatologic therapy - An update. Coondoo A. Indian Journal of Dermatology (2009) 54:3 (211-220).                                                                                                                                                                    | Review                 |
| 120 | The rapidly evolving role of anakinra in dermatology: A double-edged sword. Kapoor S. Journal of the American Academy of Dermatology (2008) 59:6 (1092-1093).                                                                                                                     | Review                 |
| 121 | Cytokine therapy in dermatology. Asadullah K. Et al. Experimental Dermatology (2002) 11:2 (97-106).                                                                                                                                                                               | Review                 |
| 122 | Immunopathogenesis of hidradenitis suppurativa and response to anti-TNF-a therapy. Lowe M.M. Et al. JCI Insight (2020) 5:19 Article Number: e139932.                                                                                                                              | No PAID syndrome       |
| 123 | Pyoderma gangrenosum: From historical perspectives to emerging investigations. Hobbs M.M., Ortega-Loayza A.G. International Wound Journal (2020) 17:5 (1255-1265).                                                                                                                | No PAID syndrome       |
| 124 | Hidradenitis suppurativa: New drugs, old challenges. Elston D.M. Journal of the American Academy of Dermatology (2020) 83:3 (733-734).                                                                                                                                            | No PAID syndrome       |
| 125 | Intravenous anakinra for cytokine storm syndromes. Martis N., Audemard-Verger A. The Lancet Rheumatology (2020) 2:9 (e522).                                                                                                                                                       | No PAID syndrome       |
| 126 | Medical and Surgical Management of Hidradenitis Suppurativa: A Review of International Treatment Guidelines and Implementation in General Dermatology Practice. Orenstein L.A.V., Nguyen T.V., Damiani G., Sayed C., Jemec G.B.E., Hamzavi I. Dermatology (2020) 236:5 (393-412). | No PAID syndrome       |
| 127 | Emerging medical treatments for hidradenitis suppurativa. Lyons A.B., Shabeeb N., Nicholson C.L., Braunberger T.L., Peacock A., Hamzavi I.H. Journal of the American Academy of Dermatology (2020) 83:2 (554-562).                                                                | No PAID syndrome       |
| 128 | Primary imputation methods impact efficacy results in hidradenitis suppurativa clinical trials. Frew J.W. Journal of the American Academy of Dermatology (2020) 83:2 (663-665).                                                                                                   | No PAID syndrome       |
| 129 | Efficacy and Safety of Canakinumab in sJIA Patients with and without Fever at Baseline: Results from an Open-label, Active Treatment Extension Study. Brunner H.I. Et al. Arthritis & rheumatology (Hoboken, N.J.) (2020).                                                        | No PAID syndrome       |
| 130 | Hidradenitis suppurativa management using tumor necrosis factor inhibitors in patients younger than 18 years: A series of 12 cases. Fougerousse A.-C., Reguiat Z., Roussel A., Bécherel P.-A. Journal of the American Academy of Dermatology (2020)                               | No PAID syndrome       |

|     |                                                                                                                                                                                                                                                                                                                                                            |                  |
|-----|------------------------------------------------------------------------------------------------------------------------------------------------------------------------------------------------------------------------------------------------------------------------------------------------------------------------------------------------------------|------------------|
|     | 83:1 (199-201).                                                                                                                                                                                                                                                                                                                                            |                  |
| 131 | Conversion to positive latent tuberculosis infection status is low in patients with hidradenitis suppurativa taking biologic medications. Ellis A., Khanna U., Galadari A., Fernandez A.P. <i>Journal of the American Academy of Dermatology</i> (2020) 83:1 (246-248).                                                                                    | No PAID syndrome |
| 132 | 856 Arthritis-associated pyoderma gangrenosum: A systematic review. Sawka E., Friedman M., Ortega-Loayza A. <i>Journal of Investigative Dermatology</i> (2020) 140:7 Supplement (S111).                                                                                                                                                                    | No PAID syndrome |
| 133 | Current Therapeutic Options for the Main Monogenic Autoinflammatory Diseases and PFAPA Syndrome: Evidence-Based Approach and Proposal of a Practical Guide. Soriano A. Et al. <i>Frontiers in Immunology</i> (2020) 11 Article Number: 865.                                                                                                                | No PAID syndrome |
| 134 | Biologic therapies for the treatment of hidradenitis suppurativa. Rosales Santillan M., Morss P.C., Porter M.L., Kimball A.B. <i>Expert Opinion on Biological Therapy</i> (2020) 20:6 (621-633).                                                                                                                                                           | No PAID syndrome |
| 135 | Efficacy of anakinra treatment in pediatric rheumatic diseases; a single-center experience. Demir F., Gurler E., Colak B., Sozeri B. <i>Annals of the Rheumatic Diseases</i> (2020) 79:SUPPL 1 (1783-1784).                                                                                                                                                | No PAID syndrome |
| 136 | Hidradenitis Suppurativa as a Potential Subtype of Autoinflammatory Keratinization Disease. Nomura T. <i>Frontiers in Immunology</i> (2020) 11 Article Number: 847.                                                                                                                                                                                        | No PAID syndrome |
| 137 | Hidradenitis suppurativa encounters in a national electronic health record database notable for low dermatology utilization, infrequent biologic prescriptions, and frequent opiate prescriptions. Wehner M.R., Micheletti R., Noe M.H., Linos E., Margolis D.J., Naik H.B. <i>Journal of the American Academy of Dermatology</i> (2020) 82:5 (1239-1241). | No PAID syndrome |
| 138 | Hidradenitis suppurativa: Current and emerging treatments. Goldberg S.R., Strober B.E., Payette M.J. <i>Journal of the American Academy of Dermatology</i> (2020) 82:5 (1061-1082).                                                                                                                                                                        | No PAID syndrome |
| 139 | Acne fulminans and <i>Cutibacterium acnes</i> phylotypes. Bocquet-Trémoureux S. Et al. <i>Journal of the European Academy of Dermatology and Venereology</i> (2020) 34:4 (827-833).                                                                                                                                                                        | No PAID syndrome |
| 140 | A concise clinician's guide to therapy for hidradenitis suppurativa. Nesbitt E., Clements S., Driscoll M. <i>International Journal of Women's Dermatology</i> (2020) 6:2 (80-84).                                                                                                                                                                          | No PAID syndrome |
| 141 | Diagnosis and novel clinical treatment strategies for pyoderma gangrenosum. Goldust                                                                                                                                                                                                                                                                        | No PAID syndrome |

|     |                                                                                                                                                                                                                                                                                     |                  |
|-----|-------------------------------------------------------------------------------------------------------------------------------------------------------------------------------------------------------------------------------------------------------------------------------------|------------------|
|     | M. Et al. Expert Review of Clinical Pharmacology (2020) 13:2 (157-161).                                                                                                                                                                                                             |                  |
| 142 | Evaluating patients' unmet needs in hidradenitis suppurativa: Results from the Global Survey Of Impact and Healthcare Needs (VOICE) Project. Garg A. Et al. Journal of the American Academy of Dermatology (2020) 82:2 (366-376).                                                   | No PAID syndrome |
| 143 | Hidradenitis suppurativa: What's new in pathogenesis and management. Wark K.J.L., Cains G.D. Medicine Today (2020) 21:2 (19-23).                                                                                                                                                    | No PAID syndrome |
| 144 | Ustekinumab with intravenous infusion: Results in hidradenitis suppurativa. Romani J., Vilarrasa E., Martorell A., Fuertes I., Ciudad C., Molina-Leyva A. Dermatology (2020) 236:1 (21-24).                                                                                         | No PAID syndrome |
| 145 | Off-Label studies on anakinra in dermatology: a review. Tegtmeyer K., Atassi G., Zhao J., Maloney N.J., Lio P.A. Journal of Dermatological Treatment (2020).                                                                                                                        | Review           |
| 146 | MABp1 targeting interleukin-1 $\alpha$ in hidradenitis suppurativa ineligible for adalimumab treatment: results of the open-label extension period. Kanni T., Argyropoulou M., Dinarello C.A., Simard J., Giamarellos-Bourboulis E.J. Clinical and Experimental Dermatology (2020). | No PAID syndrome |
| 147 | The off-label use of anakinra in pediatric systemic autoinflammatory diseases. Maniscalco V., Abu-Rumeileh S., Mastrolia M.V., Marrani E., Maccora I., Pagnini I., Simonini G. Therapeutic Advances in Musculoskeletal Disease (2020) 12.                                           | No PAID syndrome |
| 148 | The most recent advances in understanding and managing hidradenitis suppurativa. Hamzavi I.H., Narla S., Lyons A.B. F1000Research (2020) 9 Article Number: 1049.                                                                                                                    | No PAID syndrome |
| 149 | Hidradenitis suppurativa: Rapid evidence review. Wiperman J., Bragg D.A., Litzner B. American Family Physician (2019) 100:9 (562-569).                                                                                                                                              | Review           |
| 150 | Long-term therapy with anakinra in hidradenitis suppurativa in three patients. André R., Marescassier H., Gabay C., Pittet B., Laffitte E. International Journal of Dermatology (2019) 58:11 (e208-e209).                                                                           | No PAID syndrome |
| 151 | Tuscan consensus on the diagnosis and treatment of hidradenitis suppurativa. Prignano F., Pescitelli L., Giani I., Dini V., Romanelli M. Journal of the European Academy of Dermatology and Venereology (2019) 33:S6 (21-24).                                                       | No PAID syndrome |
| 152 | Biologic Treatment for Hidradenitis Suppurativa. Flood K.S., Porter M.L., Kimball A.B. American Journal of Clinical Dermatology (2019) 20:5 (625-638).                                                                                                                              | No PAID syndrome |
| 153 | Effectiveness and safety of off-label use of tocilizumab in refractory autoimmune diseases: A multicenter study. Michaud M. Arthritis and Rheumatology (2019) 71 Supplement 10 (2190-2191).                                                                                         | No PAID syndrome |
| 154 | 349 Hidradenitis Suppurativa Lesions are Characterized by Increased Kinase Signal-                                                                                                                                                                                                  | No PAID syndrome |

|     |                                                                                                                                                                                                                                                                                                                                     |                        |
|-----|-------------------------------------------------------------------------------------------------------------------------------------------------------------------------------------------------------------------------------------------------------------------------------------------------------------------------------------|------------------------|
|     | ing Activity. Rumberger B.E., Boarder E.L., Owens S., Howell M.D. <i>Journal of Investigative Dermatology</i> (2019) 139:9 Supplement (S274).                                                                                                                                                                                       |                        |
| 155 | PAPA and FMF in two siblings: Possible amplification of clinical presentation? A case report. Maggio M.C., Ceccherini I., Grossi A., Gattorno M., Corsello G. <i>Italian Journal of Pediatrics</i> (2019) 45:1 Article Number: 111.                                                                                                 | No anti-IL-1 treatment |
| 156 | North American clinical management guidelines for hidradenitis suppurativa: A publication from the United States and Canadian Hidradenitis Suppurativa Foundations: Part II: Topical, intralesional, and systemic medical management. Alikhan A. Et al. <i>Journal of the American Academy of Dermatology</i> (2019) 81:1 (91-101). | No PAID syndrome       |
| 157 | Pharmacological development in hidradenitis suppurativa. Matusiak, Jemec G.B., Szepietowski J.C. <i>Current Opinion in Pharmacology</i> (2019) 46 (65-72).                                                                                                                                                                          | No PAID syndrome       |
| 158 | PSTPIP1-associated myeloid-related proteinemia inflammatory syndrome/PAMI syndrome: Case report and review of the literature. Mejbri M., Theodoropoulou K., Hoffer M. <i>Annals of the Rheumatic Diseases</i> (2019) 78 Supplement 2 (977-978).                                                                                     | No anti-IL-1 treatment |
| 159 | Pyoderma gangrenosum - a guide to diagnosis and management. George C., Deroide F., Rustin M. <i>Clinical Medicine, Journal of the Royal College of Physicians of London</i> (2019) 19:3 (224-228).                                                                                                                                  | No PAID syndrome       |
| 160 | The role of interleukin-1b in pyoderma gangrenosum and the novel off label use of probenecid to target this cytokine<br><i>Australasian Journal of Dermatology</i> (2019) 60 Supplement 1 (16-17).                                                                                                                                  | No PAID syndrome       |
| 161 | A novel pathogenic NCSTN variant in a large Australian pedigree affected with hidradenitis suppurativa. Vekic D., Cains G., Woods J., Moghaddas F., Masters S. <i>Australasian Journal of Dermatology</i> (2019) 60 Supplement 1 (94).                                                                                              | No PAID syndrome       |
| 162 | Integrated multidisciplinary approach to hidradenitis suppurativa in clinical practice. Timila Touhouche A. <i>International Journal of Women's Dermatology</i> (2020) 6:3 (164-168).                                                                                                                                               | No PAID syndrome       |
| 163 | Pyoderma gangrenosum after cesarean section treated with skin graft: A case report. Shen J., Zhang W., Jiang X. <i>Medicine (United States)</i> (2019) 98:18 Article Number: e15380.                                                                                                                                                | No PAID syndrome       |
| 164 | Biologic and small-molecule medications in the management of pyoderma gangrenosum. McKenzie F., Cash D., Gupta A., Cummings L.W., Ortega-Loayza A.G. <i>Journal of Dermatological Treatment</i> (2019) 30:3 (264-276).                                                                                                              | Review                 |
| 165 | Scoring pyoderma gangrenosum. Schreml S. <i>British Journal of Dermatology</i> (2019) 180:3 (438-439).                                                                                                                                                                                                                              | Review                 |

|     |                                                                                                                                                                                                                                                                                                            |                  |
|-----|------------------------------------------------------------------------------------------------------------------------------------------------------------------------------------------------------------------------------------------------------------------------------------------------------------|------------------|
| 166 | Scoping review on the use of canakinumab and anakinra in interleukin-1 antagonist receptor deficiency. Hernandez Parada J., Ruano Ruiz J.A., Sáez-Torres De Vicente M., Gómez Arias P.J., Gómez García F., Isla Tejera B. <i>European Journal of Hospital Pharmacy</i> (2019) 26 Supplement 1 (A144-A145). | Review           |
| 167 | Successful control of hidradenitis suppurativa with verapamil: a case report. Laroche M.-L., Teste M., Vanoost J., Geniaux H. <i>Fundamental and Clinical Pharmacology</i> (2019) 33:1 (122-124).                                                                                                          | No PAID syndrome |
| 168 | Updated medical treatments of hidradenitis suppurativa, more options, less evidence. Gulliver W. <i>Experimental Dermatology</i> (2019) 28 Supplement 2 (5-6).                                                                                                                                             | Review           |
| 169 | Effectiveness of secukinumab (Anti-IL- 17 Monoclonal Ab) in hidradenitis suppurativa: An open study (17 cases). Becherel P.-A., Fougèrouse A.-C., Reguiat Z. <i>Experimental Dermatology</i> (2019) 28 Supplement 2 (22-23).                                                                               | No PAID syndrome |
| 170 | Systematic review of immunomodulatory therapies for hidradenitis suppurativa. Lim S.Y.D., Oon H.H. <i>Biologics: Targets and Therapy</i> (2019) 13 (53-78).                                                                                                                                                | No PAID syndrome |
| 171 | Hidradenitis suppurativa: infection, autoimmunity, or both? Constantinou C.A., Fragoulis G.E., Nikiphorou E. <i>Therapeutic Advances in Musculoskeletal Disease</i> (2019) 11.                                                                                                                             | Review           |
| 172 | Recent advances in managing and understanding pyoderma gangrenosum. Fletcher J., Alhusayen R., Alavi A. <i>F1000Research</i> (2019) 8 Article Number: 2092.                                                                                                                                                | Review           |
| 173 | Hidradenitis suppurativa/acne inversa: a practical framework for treatment optimization – systematic review and recommendations from the HS ALLIANCE working group. Zouboulis C.C. Et al. <i>Journal of the European Academy of Dermatology and Venereology</i> (2019) 33:1 (19-31).                       | No PAID syndrome |
| 174 | Biologics for hidradenitis suppurativa: An update. Włodarek K., Ponikowska M., Matusiak L., Szepietowski J.C. <i>Immunotherapy</i> (2019) 11:1 (45-59).                                                                                                                                                    | Review           |
| 175 | Biologics and immunoglobulins in the treatment of pyoderma gangrenosum – analysis of 52 patients. Herberger K., Dissemond J., Brüggstrat S., Sorbe C., Augustin M.. <i>JDDG - Journal of the German Society of Dermatology</i> (2019) 17:1 (32-41).                                                        | No PAID syndrome |
| 176 | Dysregulated neutrophil responses and neutrophil extracellular trap formation and degradation in PAPA syndrome. Mistry P. Et al. <i>Annals of the Rheumatic Diseases</i> (2018) 77:12 (1825-1833).                                                                                                         | Review           |
| 177 | Pyoderma gangrenosum: A review for the gastroenterologist. Plumptre I., Knabel D., Tomecki K. <i>Inflammatory Bowel Diseases</i> (2018) 24:12 (2510-2517).                                                                                                                                                 | Review           |
| 178 | Unconventional therapies for hidradenitis suppurativa. Marasca C., Annunziata M.C.,                                                                                                                                                                                                                        | Review           |

|     |                                                                                                                                                                                                                                                                                                         |                  |
|-----|---------------------------------------------------------------------------------------------------------------------------------------------------------------------------------------------------------------------------------------------------------------------------------------------------------|------------------|
|     | Napolitano M., Fabbrocini G. Expert Review of Clinical Pharmacology (2018) 11:9 (879-887).                                                                                                                                                                                                              |                  |
| 179 | Overview and update on biologic therapy for moderate-to-severe hidradenitis suppurativa. Porter M.L., Golbari N.M., Lockwood S.J., Kimball A.B. Seminars in Cutaneous Medicine and Surgery (2018) 37:3 (182-189).                                                                                       | Review           |
| 180 | Successful therapy for pyoderma gangrenosum with a Janus kinase 2 inhibitor. Nasifoglu S., Heinrich B., Welzel J. British Journal of Dermatology (2018) 179:2 (504-505).                                                                                                                                | No PAID syndrome |
| 181 | Effectiveness of systemic treatments for pyoderma gangrenosum: a systematic review of observational studies and clinical trials. Partridge A.C.R., Bai J.W., Rosen C.F., Walsh S.R., Gulliver W.P., Fleming P. British Journal of Dermatology (2018) 179:2 (290-295).                                   | No PAID syndrome |
| 182 | Drug-induced sarcoidosis in a patient treated with an interleukin-1 receptor antagonist for hidradenitis suppurativa. Friedman B.E., English J.C. JAAD Case Reports (2018) 4:6 (543-545).                                                                                                               | No PAID syndrome |
| 183 | Severe refractory hidradenitis suppurativa: Treatment with ixekizumab, two case reports. Cotter C., Tobin A.M., O'Connor R., Gallagher C., Connolly M. British Journal of Dermatology (2018) 179 Supplement 1 (70).                                                                                     | No PAID syndrome |
| 184 | Use of anakinra in treatment-resistant pyoderma gangrenosum. Ng A., Aamer M., Warburton K.L., Montgomery R., Laws P. British Journal of Dermatology (2018) 179 Supplement 1 (71-72).                                                                                                                    | No PAID syndrome |
| 185 | A complex case of vulval pyoderma gangrenosum. Nguyen Y., Lowe P. Australasian Journal of Dermatology (2018) 59 Supplement 1 (4-5).                                                                                                                                                                     | No PAID syndrome |
| 186 | An open-label extension study (OLE) of MABP1 targeting interleukin-1ALPHA for Hidradenitis suppurativa (HS). Argyropoulou M. Et al. Experimental Dermatology (2018) 27 Supplement 1 (9).                                                                                                                | No PAID syndrome |
| 187 | Validation of the IHS4 score as an outcome measure for Hidradenitis Suppurativa (HS): Application in treatment with MABP1 targeting interleukin-1ALPHA. Kanni T., Argyropoulou M., Stecher M., Dinarello C., Simard J., Giamarellos-Bourboulis E. Experimental Dermatology (2018) 27 Supplement 1 (20). | No PAID syndrome |
| 188 | Diagnosis and treatment of hidradenitis suppurativa. Rashed I., Welsh J.S. JAMA - Journal of the American Medical Association (2018) 319:15 (1618).                                                                                                                                                     | No PAID syndrome |
| 189 | MABp1 Targeting IL-1 $\alpha$ for Moderate to Severe Hidradenitis Suppurativa Not Eligible for Adalimumab: A Randomized Study. Kanni T. Et al. Journal of Investigative                                                                                                                                 | No PAID syndrome |



|     |                                                                                                                                                                                                                                                                                |                  |
|-----|--------------------------------------------------------------------------------------------------------------------------------------------------------------------------------------------------------------------------------------------------------------------------------|------------------|
|     | Dermatology (2018) 138:4 (795-801).                                                                                                                                                                                                                                            |                  |
| 190 | Pyoderma gangrenosum and Sweet syndrome: the prototypic neutrophilic dermatoses. Wallach D., Vignon-Pennamen M.-D. British Journal of Dermatology (2018) 178:3 (595-602).                                                                                                      | No PAID syndrome |
| 191 | Arguments for a national questionnaire-based screening for hidradenitis suppurativa in Denmark. Riis P.T., Andersen P.L., Jemec G.B. Acta Dermatovenerologica Alpina, Pannonica et Adriatica (2018) 27:3 (115-120).                                                            | No PAID syndrome |
| 192 | The critical role of macrophages in the pathogenesis of hidradenitis suppurativa. Shah A., Alhusayen R., Amini-Nik S. Inflammation Research (2017) 66:11 (931-945).                                                                                                            | No PAID syndrome |
| 193 | Recognizing syndromic hidradenitis suppurativa: a review of the literature. Gasparic J., Theut Riis P., Jemec G.B. Journal of the European Academy of Dermatology and Venereology (2017) 31:11 (1809-1816).                                                                    | Review           |
| 194 | Hidradenitis suppurativa treatment with biological. Sanabria V.P.E., Piva M.M.M., Galimberti R.L. International Journal of Dermatology (2017) 56:11 (1311).                                                                                                                    | No PAID syndrome |
| 195 | Approach to the management of patients with hidradenitis suppurativa: A consensus document. Alavi A Et al. Journal of Cutaneous Medicine and Surgery (2017) 21:6 (513-524).                                                                                                    | Review           |
| 196 | An infant with fever, pyoderma gangrenosum, osteitis, synovitis and oral ulcers: Immunology and rheumatology collaboration in a novel autoinflammatory phenotype. Kourosh A., Bharath A., Rider N., Forbes L., Muscal E. Journal of Clinical Immunology (2016) 36:3 (243-244). | No PAID syndrome |
| 197 | Dosage Considerations for Canakinumab in Children With Periodic Fever Syndromes. Zhuang L. Et al. Clinical Pharmacology and Therapeutics (2019) 106:3 (557-567).                                                                                                               | No PAID syndrome |
| 198 | A novel gene mutation associated with common variable immunodeficiency and pyoderma. Joseph N., Hostoffer R., Tcheurekdjian H. Annals of Allergy, Asthma and Immunology (2018) 121:5 Supplement (S94).                                                                         | No PAID syndrome |
| 199 | Successful treatment of pyoderma gangrenosum with anakinra in a patient with Wiskott-Aldrich syndrome. Mercuri S.R., Paolino G., De Flammis E., Didona D., Brianti P. Dermatologic Therapy (2018) 31:2 Article Number: e12582.                                                 | No PAID syndrome |
| 200 | Therapieoptionen beim Pyoderma gangraenosum. Quist S.R., Kraas L. Journal der Deutschen Dermatologischen Gesellschaft = Journal of the German Society of Dermatology: JDDG (2017) 15:1 (34-41).                                                                                | No English       |

|     |                                                                                                                                                                                                                                               |                        |
|-----|-----------------------------------------------------------------------------------------------------------------------------------------------------------------------------------------------------------------------------------------------|------------------------|
| 201 | The role of interleukin-17 in the pathogenesis of hidradenitis suppurativa. Yao Y., Thomsen S.F. <i>Dermatology Online Journal</i> (2017) 23:7.                                                                                               | No PAID syndrome       |
| 202 | Industry update: The latest developments in the field of therapeutic delivery, 1-31 December 2018. Timmins P. <i>Therapeutic Delivery</i> (2019) 10:4 (215-226).                                                                              | No PAID syndrome       |
| 203 | Combining omalizumab with another biotherapy. Fougerousse A.-C., Becherel P.-A., Pallure V., Boyé T., Reguiat Z., Gabison G., Barthelemy H., Badaoui A., Mahé E., Bulai Livideanu C. <i>Acta Dermato-Venereologica</i> (2019) 99:4 (448-449). | No anti-IL-1 treatment |
| 204 | One decade real life experience with anti-IL1 therapy in monogenic and multifactorial autoinflammatory diseases. Mendonca L.O. Et al. <i>Pediatric Rheumatology</i> (2019) 17 Supplement 1.                                                   | No PAID syndrome       |
| 205 | Two genes and one phenotype: Same therapy? Ricci S. Et al. <i>Pediatric Rheumatology</i> (2019) 17 Supplement 1.                                                                                                                              | No PAID syndrome       |

**Table S4. Mapping studies on PAPA.**

| <b>ID article</b> | <b>Journal / Journal speciality/Year</b>                        | <b>Number of authors</b> | <b>Type of publication</b> | <b>Country</b>  | <b>Type of study/subtype</b>  | <b>Patients</b> | <b>Affiliations</b> | <b>Uni or multicenter/ specialities involved</b>               | <b>A priori design / Registered protocol</b> | <b>Funding (type) / Conflict of interest</b> |
|-------------------|-----------------------------------------------------------------|--------------------------|----------------------------|-----------------|-------------------------------|-----------------|---------------------|----------------------------------------------------------------|----------------------------------------------|----------------------------------------------|
| 1                 | Rheumatology/<br>Rheumatology/<br>2005                          | 4                        | Letter                     | The Netherlands | Observational/<br>Case report | 1               | 1                   | Unicenter/<br>Rheumatology<br>Immunology<br>Pediatrics         | No<br>No                                     | NA<br>No                                     |
| 2                 | Pediatric<br>Dermatology/<br>Dermatology/<br>2005               | 3                        | Full paper                 | USA             | Observational/<br>Case report | 1               | 2                   | Unicenter/<br>Pediatrics<br>Immunology<br>Dermatology          | No<br>No                                     | NA<br>NA                                     |
| 3                 | British Journal<br>of Dermatology/<br>Dermatology/<br>2009      | 5                        | Full paper                 | Germany         | Observational/<br>Case report | 1               | 2                   | Unicenter/<br>Dermatology<br>Rheumatology<br>Internal Medicine | No<br>No                                     | NA<br>No                                     |
| 4                 | Annals of<br>Rheumatology<br>Diseases/<br>Rheumatology/<br>2011 | 6                        | Letter                     | The Netherlands | Observational/<br>Case report | 3               | 2                   | Unicenter<br>/<br>Dermatology<br>General Internal<br>Medicine  | No<br>No                                     | NA<br>NA                                     |
| 6                 | JAMA<br>Dermatology/<br>Dermatology/                            | 9                        | Full paper                 | Austria         | Observational/<br>Case report | 1               | 7                   | Unicenter/<br>Dermatology,<br>Immunology,                      | No<br>No                                     | NA<br>No                                     |

| <b>ID article</b> | <b>Journal / Journal speciality/Year</b>              | <b>Number of authors</b> | <b>Type of publication</b> | <b>Country</b>         | <b>Type of study/subtype</b>  | <b>Patients</b> | <b>Affiliations</b> | <b>Uni or multicenter/ specialities involved</b>                                     | <b>A priori design / Registered protocol</b> | <b>Funding (type) / Conflict of interest</b> |
|-------------------|-------------------------------------------------------|--------------------------|----------------------------|------------------------|-------------------------------|-----------------|---------------------|--------------------------------------------------------------------------------------|----------------------------------------------|----------------------------------------------|
|                   | 2013                                                  |                          |                            |                        |                               |                 |                     | Laboratory<br>Medicine,<br>Pathobiology of<br>the skin, Allergy                      |                                              |                                              |
| 8                 | The Journal of Rheumatology/<br>Rheumatology/<br>2014 | 4                        | Letter                     | Italy                  | Observational/<br>Case report | 1               | 1                   | Unicenter/<br>Pediatrics                                                             | No<br>No                                     | NA<br>NA                                     |
| 11                | Pediatric Rheumatology/<br>Rheumatology/<br>2015      | 11                       | Abstract                   | Italy                  | Observational/<br>Case series | 6               | 3                   | Multicenter<br>/<br>Pediatrics<br>Rheumatology                                       | No<br>No                                     | NA<br>NA                                     |
| 12                | Pediatric Rheumatology/<br>Rheumatology/<br>2015      | 8                        | Abstract                   | Italy                  | Observational/<br>Case series | 5               | 7                   | Multicenter/<br>Pediatrics<br>Rheumatology<br>Dermatology                            | No<br>No                                     | NA<br>NA                                     |
| 13                | Pediatric Rheumatology/<br>Rheumatology/<br>2015      | 6                        | Abstract                   | Bosnia and Herzegovina | Observational/<br>Case report | 1               | 4                   | Multicenter/<br>Rheumatology<br>Immunology<br>Allergy Pediatrics<br>Gastroenterology | No<br>No                                     | NA<br>NA                                     |

| ID article | Journal / Journal speciality/Year                     | Number of authors | Type of publication | Country | Type of study/subtype                       | Patients | Affiliations | Uni or multicenter/ specialities involved                      | A priori design / Registered protocol | Funding (type) / Conflict of interest |
|------------|-------------------------------------------------------|-------------------|---------------------|---------|---------------------------------------------|----------|--------------|----------------------------------------------------------------|---------------------------------------|---------------------------------------|
|            |                                                       |                   |                     |         |                                             |          |              | and Hepatology<br>Infectious diseases                          |                                       |                                       |
| 16         | The Journal of Rheumatology/<br>Rheumatology/<br>2016 | 6                 | Abstract            | Canada  | Observational/<br>Case report               | 2        | 3            | Multicenter<br>/<br>Pediatrics<br>Rheumatology                 | No<br>No                              | NA<br>NA                              |
| 17         | Rheumatology/<br>Rheumatology/<br>2016                | 14                | Full paper          | Italy   | Observational/<br>Case report               | 13       | 5            | Multicenter/<br>Rheumatology<br>Pediatrics                     | No<br>No                              | Yes (public)<br>Yes (Novartis)        |
| 19         | Infection/<br>Infectious<br>diseases/<br>2017         | 4                 | Full paper          | Germany | Observational/<br>Case report<br>And review | 1        | 3            | Multicenter/<br>Infectious<br>medicine Allergy                 | No<br>No                              | NA<br>No                              |
| 22         | Pediatric<br>Radiology/<br>Pediatrics/<br>2018        | 7                 | Full paper          | Canada  | Observational/<br>Case series               | 2        | 8            | Multicenter<br>/<br>Radiology,<br>Pediatrics,<br>Rheumatology, | No<br>No                              | NA<br>Yes (Sobi and<br>Novartis)      |
| 25         | Annals of<br>Rheumatology                             | 7                 | Abstract            | Italy   | Observational/<br>Case series               | 7        | 2            | Multicenter<br>/                                               | No<br>No                              | NA<br>Yes (                           |

| ID article | Journal / Journal speciality/Year          | Number of authors | Type of publication | Country | Type of study/subtype      | Patients | Affiliations | Uni or multicenter/ specialities involved                | A priori design / Registered protocol | Funding (type) / Conflict of interest                      |
|------------|--------------------------------------------|-------------------|---------------------|---------|----------------------------|----------|--------------|----------------------------------------------------------|---------------------------------------|------------------------------------------------------------|
|            | Diseases/ Rheumatology/ 2019               |                   |                     |         |                            |          |              | Dermatology, Rheumatology, Immunology, Pediatrics        |                                       | Abbvie, SOBI, Novimmune, Roche, Novartis, SaNofi, Pfizer ) |
| 26         | Pediatric Rheumatology/ Rheumatology/ 2019 | 14                | Abstract            | Italy   | Observational/ Case series | 34       | 2            | Multicenter/ Rheumatology Immunology                     | No<br>No                              | NA<br>No                                                   |
| 29         | Arthritis Rheumatoid/ Rheumatology/ 2012   | 8                 | Full paper          | USA     | Observational/ Case report | 5        | 4            | Multicenter/ Allergy Infectious diseases Oncology Genome | No<br>No                              | Yes (public/private)<br>Yes (Pfizer)                       |

Abbreviations: NA, not available PA.

**Table S5. Mapping studies on PAMI.**

| <b>ID article / Syndrome</b> | <b>Journal / Journal speciality/Year</b>              | <b>Number of authors</b> | <b>Type of publication</b> | <b>Country</b> | <b>Type of study/subtype</b> | <b>Number of patients</b> | <b>Number affiliations</b> | <b>Uni or multicenter/ specialities involved</b>                               | <b>A priori design / Registered protocol</b> | <b>Funding (type) / Conflict of interest</b>                                                                                           |
|------------------------------|-------------------------------------------------------|--------------------------|----------------------------|----------------|------------------------------|---------------------------|----------------------------|--------------------------------------------------------------------------------|----------------------------------------------|----------------------------------------------------------------------------------------------------------------------------------------|
| 21<br>PAMI                   | British Journal of Dermatology / Dermatology / 2018   | 6                        | Letter                     | Switzerland    | Observational/ Case report   | 1                         | 3                          | Multicenter / Dermatology, Genetics, Rheumatology, Pediatrics                  | No<br>No                                     | Yes (public)<br>No                                                                                                                     |
| 23<br>PAMI                   | Annals of Rheumatology Diseases / Rheumatology / 2018 | 12                       | Abstract                   | Russia         | Observational/ Case series   | 6                         | 2                          | Unicenter/ Pediatrics, Molecular laboratory                                    | No<br>No                                     | NA<br>No                                                                                                                               |
| 24<br>PASS                   | British Journal of Dermatology / Dermatology / 2019   | 14                       | Letter                     | France         | Observational/ Case series   | 9                         | 9                          | Multicenter/ Dermatology, Genetics, Pathology, Gastroenterology, Rheumatology, | No<br>No                                     | Yes (public)<br>Yes ( AbbVie, Ammirall, Amgen, Boehringer-Ingelheim, Celgene, Janssen, Leo Pharma, Lilly, Mylan, Novartis, Pfizer, Sun |

| ID article / Syndrome | Journal / Journal speciality/Year      | Number of authors | Type of publication | Country | Type of study/subtype       | Number of patients | Number affiliations | Uni or multicenter/specialities involved                    | A priori design / Registered protocol | Funding (type) / Conflict of interest                                                                                                                                       |
|-----------------------|----------------------------------------|-------------------|---------------------|---------|-----------------------------|--------------------|---------------------|-------------------------------------------------------------|---------------------------------------|-----------------------------------------------------------------------------------------------------------------------------------------------------------------------------|
|                       |                                        |                   |                     |         |                             |                    |                     |                                                             |                                       | Pharmaceuticals, Bristol-Myers Squibb, MSD, Roche-Chugai, AstraZeneca, Grunenthal, Ipsen/Menarini, Savient, SaNofi Aventis, UCB, and grant support from Pfizer and L'Oreal) |
| 32 PAMI               | Clinical and Experimental Rheumatology | 6                 | Case report         | Italy   | Observational / Case report | 1                  | 4                   | Multicenter / Rheumatology, Pediatrics, Genetics            | No<br>No                              | NA<br>No                                                                                                                                                                    |
| 33 PAMI               | Pediatric Rheumatology                 | 9                 | Full paper          | Brazil  | Observational / Case series | 1                  | 5                   | Multicenter / Immunology, Allergy, Pediatrics, Rheumatology | No<br>No                              | No<br>Yes (Novartis)                                                                                                                                                        |
| 34 PAMI               | Frontiers in Medicine                  | 9                 | Case report         | Italy   | Observational / Case report | 1                  | 5                   | Multicenter / Nephrology, Genetics, Immunology              | No<br>No                              | Yes (public)<br>No                                                                                                                                                          |
| 35 PAMI               | Pediatrics                             | 7                 | Case report         | Italy   | Observational / Case report | 1                  | 4                   | Multicenter / Hematology, Pediatrics,                       | No<br>No                              | No<br>No                                                                                                                                                                    |



| <b>ID article / Syndrome</b> | <b>Journal / Journal speciality/Year</b> | <b>Number of authors</b> | <b>Type of publication</b> | <b>Country</b> | <b>Type of study/subtype</b> | <b>Number of patients</b> | <b>Number affiliations</b> | <b>Uni or multicenter/specialities involved</b> | <b>A priori design / Registered protocol</b> | <b>Funding (type) / Conflict of interest</b> |
|------------------------------|------------------------------------------|--------------------------|----------------------------|----------------|------------------------------|---------------------------|----------------------------|-------------------------------------------------|----------------------------------------------|----------------------------------------------|
| Genetics                     |                                          |                          |                            |                |                              |                           |                            |                                                 |                                              |                                              |

Abbreviation: NA, not available.

**Table S6. Mapping studies on PASH.**

| Study [references] | Journal / Journal speciality/Year                                        | Number of authors | Type       | Country            | Type of study/subtype      | Number of patients | Number affiliations | Uni or multicenter/ specialities involved     | A priori design / Registered protocol | Funding (type) / Conflict of interest |
|--------------------|--------------------------------------------------------------------------|-------------------|------------|--------------------|----------------------------|--------------------|---------------------|-----------------------------------------------|---------------------------------------|---------------------------------------|
| 5                  | Journal American Academy of Dermatology / Dermatology / 2012             | 4                 | Full paper | Germany            | Observational/ Case report | 1                  | 1                   | Unicenter/ Dermatology                        | No<br>No                              | No<br>No                              |
| 10                 | British Journal of Dermatology / Dermatology/ 2015                       | 5                 | Letter     | Spain              | Observational/ Case report | 1                  | 1                   | Unicenter/ Dermatology                        | No<br>No                              | No<br>NA                              |
| 14                 | Journal European Academy Dermatology and Venereology / Dermatology/ 2014 | 7                 | Full paper | Germany<br>Austria | Observational/ Case report | 1                  | 4                   | Multicenter/ Dermatology Rheumatology Allergy | No<br>No                              | No<br>No                              |
| 18                 | International Journal of Dermatology / Dermatology / 2017                | 5                 | Abstract   | Ireland            | Observational/ Case report | 1                  | 1                   | Unicenter / Dermatology                       | No<br>No                              | No<br>No                              |
| 20                 | Journal of clinical and aesthetic dermatology                            | 4                 | Full paper | USA                | Observational/ Case report | 1                  | 1                   | Unicenter/ Dermatology                        | No<br>No                              | No<br>No                              |

| Study [references] | Journal / Journal speciality/Year                        | Number of authors | Type        | Country   | Type of study/subtype       | Number of patients | Number affiliations | Uni or multicenter/ specialities involved | A priori design / Registered protocol | Funding (type) / Conflict of interest |
|--------------------|----------------------------------------------------------|-------------------|-------------|-----------|-----------------------------|--------------------|---------------------|-------------------------------------------|---------------------------------------|---------------------------------------|
|                    | / Dermatology/ 2017                                      |                   |             |           |                             |                    |                     |                                           |                                       |                                       |
| 27                 | Australasian Journal of Dermatology / Dermatology / 2020 | 5                 | Letter      | Australia | Observational/ Case report  | 1                  | 3                   | Multicenter/ Dermatology                  | No<br>No                              | NA<br>Yes (Sun Pharma)                |
| 36                 | Journal of the American Academy of Dermatology           | 7                 | Case report | France    | Observational / Case report | 1                  | 2                   | Unicenter / Dermatology                   | No<br>No                              | No<br>No                              |

Abbreviation: NA, not available.

**Table S7. Mapping studies on PASS, PAPASH, and PAC syndromes.**

| ID article/Syndrome | Journal / Journal speciality/Year                         | Number of authors | Type of publication | Country     | Type of study/subtype      | Number of patients | Number affiliations | Uni or multicenter/ specialities involved                                      | A priori design / Registered protocol | Funding (type) / Conflict of interest                                                                                                              |
|---------------------|-----------------------------------------------------------|-------------------|---------------------|-------------|----------------------------|--------------------|---------------------|--------------------------------------------------------------------------------|---------------------------------------|----------------------------------------------------------------------------------------------------------------------------------------------------|
| 7<br>PAPASH         | JAMA Dermatology / Dermatology / 2013                     | 6                 | Letter              | Italy       | Observational/ Case report | 1                  | 4                   | Multicenter / Dermatology Pediatrics                                           | No<br>No                              | NA<br>No                                                                                                                                           |
| 9<br>PAC            | Clinical and Experimental Dermatology / Dermatology/ 2015 | 6                 | Full paper          | Israel      | Observational/ Case report | 1                  | 2                   | Unicenter/ Dermatology Pathology                                               | No<br>No                              | NA<br>No                                                                                                                                           |
| 15<br>PASS          | Dermatology / Dermatology / 2016                          | 9                 | Full paper          | Switzerland | Observational/ Case report | 1                  | 2                   | Unicenter/ Dermatology Rheumatology                                            | No<br>No                              | No<br>No                                                                                                                                           |
| 24<br>PASS          | British Journal of Dermatology /Dermatology/ 2019         | 14                | Letter              | France      | Observational/ Case series | 9                  | 9                   | Multicenter/ Dermatology, Genetics, Pathology, Gastroenterology, Rheumatology, | No<br>No                              | Yes (public)<br>Yes (AbbVie, Almirall, Amgen, Boehringer-Ingelheim, Celgene, Janssen, Leo Pharma, Lilly, Mylan, Novartis, Pfizer, Sun Pharmaceuti- |

| ID article/Syndrome | Journal / Journal speciality/Year                                         | Number of authors | Type of publication | Country | Type of study/subtype         | Number of patients | Number of affiliations | Uni or multicenter/specialities involved                                 | A priori design / Registered protocol | Funding (type) / Conflict of interest                                                                                                                            |
|---------------------|---------------------------------------------------------------------------|-------------------|---------------------|---------|-------------------------------|--------------------|------------------------|--------------------------------------------------------------------------|---------------------------------------|------------------------------------------------------------------------------------------------------------------------------------------------------------------|
|                     |                                                                           |                   |                     |         |                               |                    |                        |                                                                          |                                       | cals, Bristol-Myers Squibb, MSD, Roche-Chugai, AstraZeneca, Grunenthal, Ipsen/Menarini, Savient, Sanofi Aventis, UCB, and grant support from Pfizer and L'Oreal) |
| 28<br>PASS          | Journal European Academy Dermatology and Venereology / Dermatology / 2020 | 7                 | Letter              | France  | Observational/<br>Case report | 1                  | 3                      | Multicenter / Dermatology, Genetics                                      |                                       | NA<br>NA                                                                                                                                                         |
| 30<br>PAPASH        | Medicine / General Medicine / 2014                                        | 12                | Full paper          | Italy   | Observational/<br>Case report | 1                  | 7                      | Multicenter/<br>Dermatology<br>Rheumatology<br>General Internal Medicine |                                       | Yes (public)<br>No                                                                                                                                               |

Abbreviation: NA, not available.

**Table S8. Genetics and clinical characteristics of patients with PAPA included in the review.**

| ID article/<br>ID Patient | Gender / age onset<br>/ age diagnostic /<br>country | Number<br>cycles | PG  | PA  | A   | PSTPIP1<br>mutations | Others                                                                                                                                               |
|---------------------------|-----------------------------------------------------|------------------|-----|-----|-----|----------------------|------------------------------------------------------------------------------------------------------------------------------------------------------|
| 19/1                      | Male<br>8 years<br>42 years<br>Germany              | 2                | No  | Yes | Yes | p.A230T              | Low fever, cell count sinovial<br>54,000/microlitro, 82% neutrófilos, no<br>cristales; Sinovitis right elbow, right<br>knee, ankle, fingers and toes |
| 17/2                      | Male<br>NA<br>4 years<br>Italy                      | 1                | No  | Yes | No  | p.E250Q              | NA                                                                                                                                                   |
| 17/3                      | Male<br>NA<br>12 years<br>Italy                     | 2                | Yes | No  | No  | p.E250K              | One cutaneous absces, microcitic<br>anaemia (Hb 7.4 mg/dl), splenomegaly,<br>growth delay                                                            |
| 17/4                      | Female<br>NA<br>23 years<br>Italy                   | 1                | Yes | Yes | Yes | p.E256G              | NA                                                                                                                                                   |
| 17/5                      | Female<br>NA<br>2 years<br>Italy                    | 1                | No  | Yes | No  | p.E256G              | Sterile osteomyelitis, one palpebral<br>oedema                                                                                                       |
| 17/6                      | Female<br>NA<br>51 years<br>Italy                   | 1                | No  | Yes | Yes | p.E250Q              | Dactylitis/tendinitis                                                                                                                                |
| 16/7                      | NA<br>NA<br>NA<br>Canada                            | 1                | No  | Yes | No  | p.A230T              | NA                                                                                                                                                   |
| 16/8                      | NA<br>NA                                            | 1                | No  | Yes | No  | p.G904A              | NA                                                                                                                                                   |

| ID article/<br>ID Patient | Gender / age onset<br>/ age diagnostic /<br>country      | Number<br>cycles | PG  | PA  | A   | PSTPIP1<br>mutations | Others                                                                                     |
|---------------------------|----------------------------------------------------------|------------------|-----|-----|-----|----------------------|--------------------------------------------------------------------------------------------|
|                           | NA<br>Canada                                             |                  |     |     |     |                      |                                                                                            |
| 13/9                      | Male<br>2 years<br>16 years<br>Bosnia and<br>Herzegovina | 1                | Yes | Yes | Yes | p.E250Q              | Microcytic anaemia                                                                         |
| 11/10                     | Male<br>NA<br>NA<br>Italy                                | 1                | Yes | No  | No  | Wild Type            | Cutaneous abscesses, pyogenic<br>muscular abscess                                          |
| 8/11                      | Female<br>1,5 years<br>3 years<br>Italy                  | 1                | No  | Yes | No  | p.E250Q              | Low grade fever, leukocytosis, chronic<br>recurrent multifocal osteomyelitis               |
| 6/12                      | Male<br>Early childhood<br>22<br>Iran                    | 2                | Yes | Yes | Yes | p.G258A              | Aphthous lesions in oral mucosa, fever,<br>CRP 24 mg/dL, hypochromic microcytic<br>anaemia |
| 4/13                      | Female<br>18 years<br>33 years<br>The Netherlands        | 1                | No  | Yes | Yes | p.A230T              | Abscesses, abdominal pain, spontaneous<br>abortion, thrombosis, fever, increased<br>CRP    |
| 3/14                      | Male<br>12 years<br>42 years<br>Germany                  | 1                | Yes | Yes | Yes | p.A230T              | NA                                                                                         |
| 2/15                      | Male<br>5 years 8 years<br>USA                           | 1                | Yes | Yes | Yes | PSTPIP1 (UM)         | NA                                                                                         |
| 1/16                      | Male<br>16 years<br>16 years                             | 1                | No  | Yes | Yes | p.A230T              | Mild anaemia, ESR 85mm/h, CRP 144<br>mg/l                                                  |

| ID article/<br>ID Patient | Gender / age onset<br>/ age diagnostic /<br>country | Number<br>cycles | PG  | PA  | A   | PSTPIP1<br>mutations | Others                                                                                                                                     |
|---------------------------|-----------------------------------------------------|------------------|-----|-----|-----|----------------------|--------------------------------------------------------------------------------------------------------------------------------------------|
|                           | The Netherlands                                     |                  |     |     |     |                      |                                                                                                                                            |
| 29/17                     | Male<br>2 years<br>46 years<br>USA                  | 1                | Yes | Yes | Yes | p.A230T              | Pthergy, pustules, sterile skin abscesses,<br>severe colonic inflammation with<br>dapsons                                                  |
| 29/18                     | Male<br>4 months<br>10 years<br>Hispanic            | 1                | Yes | Yes | No  | p.E250Q              | Sterile osteomyelitis, sterile skin<br>abscesses, recurrent otitis                                                                         |
| 29/19                     | Male<br>8 years<br>18 years<br>USA                  | 1                | No  | Yes | Yes | p.A230T              | NA                                                                                                                                         |
| 29/20                     | Female<br>1 month<br>18 years<br>USA                | 1                | Yes | Yes | No  | p.E250K              | Lymphadenopathy, splenomegaly,<br>thrombocytopenia, hemolytic anemia,<br>pharyngeal papillomatosis, T cell large<br>granular lymphocytosis |
| 22/21                     | Male<br>5 years<br>15 years<br>Canada               | 1                | No  | Yes | No  | PSTPIP1 (UM)         | NA                                                                                                                                         |
| 22/22                     | Male<br>4 years<br>16 years<br>Canada               | 1                | NA  | Yes | NA  | PSTPIP1 (UM)         | CRP elevation, ESR elevation,<br>leukocytosis                                                                                              |

Abbreviations: PA, pyogenic arthritis; A, acne; PG, pyoderma gangrenosum; p, protein; PSTPIP1 (UM), unspecified-mutation in PSTPIP1 gene; NA, not available.



**Table S9. Genetics and clinical characteristics of patients with PAMI included in the review.**

| <b>ID article/<br/>ID Patient</b> | <b>Gender/age<br/>onset/age<br/>diagnostic/<br/>country</b> | <b>Cycles</b> | <b>PG</b> | <b>PA</b>  | <b>A</b> | <b>PSTPIP1<br/>mutations</b> | <b>Others</b>                                                                                                                                             |
|-----------------------------------|-------------------------------------------------------------|---------------|-----------|------------|----------|------------------------------|-----------------------------------------------------------------------------------------------------------------------------------------------------------|
| 21/5                              | Male<br>7 years<br>23 years<br>NA                           | 1             | Yes       | Arthritis  | Yes      | p.E250K                      | Anaemia, neutropenia, mild thrombocytopenia and hepatosplenomegaly, CPR elevation, elevation of serum zinc, calprotectin and calgranulin C, osteomyelitis |
| 23/6                              | No data<br>No data<br>No data<br>Russia                     | 1             | No data   | No data    | No data  | p.E250K                      | anaemia, neutropenia, mild thrombocytopenia and hepatosplenomegaly, CPR elevation, elevation of serum zinc, calprotectin and calgranulin C, osteomyelitis |
| 31 /8                             | Male<br>At birth<br>1 year<br>Russia                        | 1             | No        | Arthritis  | No       | p.E250K                      | Vasculitis, paniculitis, ulcerative gastritis, nonactive colitis, hepatosplenomegaly, lymphadenopathy, fever, cytopenia, myocarditis, hemolytic anemia    |
| 31 /9                             | Female<br>2.5 months<br>0.5 years<br>Germany                | 2             | No        | No         | No       | p.E250K                      | Lymphadenopathy, fever, cytopenia                                                                                                                         |
| 31 / 10                           | Female<br>At birth<br>5.4 years<br>UK                       | 1             | No        | Arthralgia | No       | p.E250K                      | Scalp hair heterochromia, lentigines, photosensitivity, chronic diarrhea, hepato/splenomegaly, lymphadenopathy, fever, cytopenia, aseptic osteomyelitis   |

| ID article/<br>ID Patient | Gender/age<br>onset/age<br>diagnostic/<br>country | Cycles | PG  | PA                                                                     | A   | PSTPIP1<br>mutations   | Others                                                                                                                                                                                                                                                                                                         |
|---------------------------|---------------------------------------------------|--------|-----|------------------------------------------------------------------------|-----|------------------------|----------------------------------------------------------------------------------------------------------------------------------------------------------------------------------------------------------------------------------------------------------------------------------------------------------------|
| 32/23                     | Male<br>7 years<br>8 years<br>Italy               | 1      | No  | Yes                                                                    | No  | E250K                  | Hepatosplenomegaly<br>Leukopenia with neutropenia<br>Trilinear dysplasia<br>CRP elevation<br>ESR elevation<br>Blood zinc elevation<br>Calprotectin MRP8/14<br>elevation                                                                                                                                        |
| 33 /11                    | Female<br>At birth<br>4 years<br>Brazil           | 1      | No  | Arthritis                                                              | NA  | p.E250K,<br>c.748G > A | Diarrhea, paleness, mucosal<br>bleeding, neutropenia,<br>anemiathrombocytopenia,<br>fever, non-specific macular<br>skin rash, splenomegaly, high<br>levels of ESR, CRP and SAA,<br>zinc and calprotectin                                                                                                       |
| 34 /12                    | Male<br>6 months<br>8 years<br>Italy              | 3      | Yes | Asymmetrica<br>l polyarthritis<br>at large joints<br>of lower<br>limbs | Yes | p.E250K,<br>c.748G > A | Hepatomegaly, splenomegaly,<br>microcytic anemia,<br>neutropenia,<br>dyserythropoiesis, high serum<br>levels of zinc and calprotectin,<br>growth hormone deficiency,<br>proteinuria, microhematuria,<br>hyperuricemia, high levels of<br>CRP and SAA, focal<br>segmental glomerulosclerosis,<br>renal fibrosis |
| 35 /13                    | Male<br>At birth<br>2 years<br>Italy              | 1      | NA  | NA                                                                     | NA  | p.E250K,<br>c.748G > A | Recurrent pyelonephritis,<br>normochromic normocytic<br>anemia, hepatosplenomegaly,<br>dysmorphic features, icteric<br>skin, severe inguinal hernia,<br>axial hypotonia, marked<br>developmental delay,<br>anisopoikilocytosis,                                                                                |

| ID article/<br>ID Patient | Gender/age<br>onset/age<br>diagnostic/<br>country | Cycles | PG | PA | A | PSTPIP1<br>mutations | Others                                                                                                          |
|---------------------------|---------------------------------------------------|--------|----|----|---|----------------------|-----------------------------------------------------------------------------------------------------------------|
|                           |                                                   |        |    |    |   |                      | dyserythropoiesis, fever,<br>lymphadenopathy, high levels<br>of CRP, procalcitonin, ferritin,<br>interleukin-18 |

Abbreviations: PA, pyogenic arthritis; A, acne; PG, pyoderma gangrenosum; p, protein; c, cDNA; PSTPIP1 (UM), unspecified-mutation in PSTPIP1 gene; NA, not available.

**Table S10. Genetics and clinical characteristics of patients with PASH included in the review.**

| <b>ID article/<br/>ID Patient</b> | <b>Gender/age<br/>onset/age diagnostic/<br/>country</b> | <b>Number<br/>cycles</b> | <b>PA</b> | <b>SH</b> | <b>A</b> | <b>PSTPIP1<br/>mutations</b>                                                                                   | <b>Others</b>                                                                                                 |
|-----------------------------------|---------------------------------------------------------|--------------------------|-----------|-----------|----------|----------------------------------------------------------------------------------------------------------------|---------------------------------------------------------------------------------------------------------------|
| 5 / 1                             | Male<br>27 years<br>34 years<br>Russia                  | 1                        | Yes       | Yes       | Yes      | Increased number of<br>CCTG microsatellite<br>repeats in the PSPTIP1<br>promoter region with<br>heterozygosity | 20-pack-year smoking,<br>increase of leucocytes,<br>thrombocytes, CRP and<br>GGT and serum amyloid<br>A       |
| 10 / 2                            | Male<br>17 years<br>32 years<br>Spain                   | 1                        | NA        | Yes       | NA       | NA                                                                                                             | Ex smoker, BMI 25,                                                                                            |
| 14 / 3                            | Female<br>15 years<br>22 years<br>Turkey                | 1                        | Yes       | Yes       | Yes      | NA                                                                                                             | NA                                                                                                            |
| 18 / 4                            | Female<br>31 years<br>34 years<br>Ireland               | 1                        | Yes       | Yes       | Yes      | NA                                                                                                             | Depression, high BMI,<br>hepatitis B carrier, ex<br>smoker,                                                   |
| 20 / 5                            | Female<br>37 years<br>27 years<br>USA                   | 1                        | Yes       | Yes       | Yes      | NA                                                                                                             | BMI 42.93, stage IV<br>chronic disease, type II<br>diabetes mellitus,<br>hypertension, obesity,<br>depression |
| 27 / 6                            | Male<br>NA<br>43 years<br>Australia                     | 1                        | Yes       | Yes       | Yes      | NA                                                                                                             | NA                                                                                                            |
| 36 / 7                            | Male<br>Adolescence<br>59 years<br>France               | 1                        | Yes       | Yes       | Yes      | No                                                                                                             | NA                                                                                                            |

**Table S11. Genetics and clinical characteristics of patients with PASS, PAPASH and PAC included in the review.**

| ID article/<br>ID Patient | Syndro<br>me | Gender/age<br>onset/age<br>diagnostic/<br>country | Cycles | PG  | AS                                                                         | A   | SH  | UC | PSTPIP1<br>mutations                                                 | Others                                                                                                                                                                                                                                                                                                         |
|---------------------------|--------------|---------------------------------------------------|--------|-----|----------------------------------------------------------------------------|-----|-----|----|----------------------------------------------------------------------|----------------------------------------------------------------------------------------------------------------------------------------------------------------------------------------------------------------------------------------------------------------------------------------------------------------|
| 15/2                      | PASS         | Male<br>NA<br>32 years<br>Congo                   | 1      | Yes | Yes                                                                        | Yes | Yes | -  | NA                                                                   | Hepatitis B infection and $\alpha$ -thalassemia, elevated CPR                                                                                                                                                                                                                                                  |
| 24/3                      | PASS         | Female<br>32 years<br>33 years<br>France          | 1      | Yes | Undifferentiated<br>spondylitis                                            | NA  | Yes | -  | NA                                                                   | Intermittent fever                                                                                                                                                                                                                                                                                             |
| 28/4                      | PASS         | Male<br>NA<br>20 years<br>France                  | 1      | Yes | Yes                                                                        | Yes | Yes | -  | Sequence<br>variant in the<br>NLRP3 gene<br>was detected:<br>p.Q703K | NA                                                                                                                                                                                                                                                                                                             |
| 34 /12                    | PAMI         | Male<br>6 months<br>8 years<br>Italy              | 3      | Yes | Asymmetric<br>al<br>polyarthriti<br>s at large<br>joints of<br>lower limbs | Yes | No  | -  | p.E250K,<br>c.748G > A                                               | Hepatomegaly, spleNomegaly,<br>microcytic anemia,<br>neutropenia,<br>dyserythropoiesis, high serum<br>levels of zinc and calprotectin,<br>growth hormone deficiency,<br>proteinuria, microhematuria,<br>hyperuricemia, high levels of<br>CRP and SAA, focal<br>segmental glomerulosclerosis,<br>renal fibrosis |
| 35 /13                    | PAMI         | Male<br>At birth<br>2 years<br>Italy              | 1      | NA  | NA                                                                         | NA  | NA  | -  | p.E250K,<br>c.748G > A                                               | Recurrent pyelonephritis,<br>Normochromic Normocytic<br>anemia, hepatospleNomegaly,<br>dysmorphic features, icteric<br>skin, severe inguinal hernia,<br>axial hypotonia, marked                                                                                                                                |

|     |        |                                            |   |     |           |     |     |     |                                 |                                                                                                                                                                 |
|-----|--------|--------------------------------------------|---|-----|-----------|-----|-----|-----|---------------------------------|-----------------------------------------------------------------------------------------------------------------------------------------------------------------|
|     |        |                                            |   |     |           |     |     |     |                                 | developmental delay,<br>anisopoikilocytosis,<br>dyserythropoiesis, fever,<br>lymphadenopathy, high levels<br>of CRP, procalcitonin, ferritin,<br>interleukin-18 |
| 7/1 | PAPASH | Female<br>14 years<br>16 years<br>Moldavia | 1 | Yes | Arthritis | Yes | Yes | -   | p.E277D<br>missense<br>mutation | NA                                                                                                                                                              |
| 9/7 | PAC    | Male<br>30 years<br>33 years<br>Israel     | 1 | Yes | -         | Yes | -   | Yes | mutation<br>p.G403R             | Recalcitrant pustular rash                                                                                                                                      |

Abbreviations: PA, pyogenic arthritis; A, acne; PG, pyoderma gangrenosum; SH, suppurative hidradenitis; SA, ankylosing spondylitis; PsA, psoriatic arthritis; UC, ulcerative Colitis; p, protein; c, cDNA; PSTPIP1 (UM), unspecified-mutation in PSTPIP1; NA, not available.
